# Supplementary material for: Exploring the microbial community (microflora) associated with ovine Haemonchus contortus (macroflora) field strains
Source: PubMed Central journal article supplement (PMC5427911; doi:10.1038/s41598-017-00171-2), 2017-03-06
Supplement: 41598_2017_171_MOESM1_ESM.pdf [file 41598_2017_171_MOESM1_ESM.pdf]

*Supplementary Information*

**Exploring the microbial community (microflora) associated with ovine *Haemonchus contortus* (macroflora) field strains**

Saeed El-Ashram<sup>1,2,3,4,\*</sup>, Xun Suo<sup>1,2,3</sup>

<sup>1</sup> State Key Laboratory for Agrobiotechnology & College of Veterinary Medicine, China Agricultural University, Beijing 100193, China

<sup>2</sup> National Animal Protozoa Laboratory & College of Veterinary Medicine, China Agricultural University, Beijing 100193, China

<sup>3</sup> Key Laboratory of Animal Epidemiology and Zoonosis of Ministry of Agriculture, Beijing 100193, China

<sup>4</sup> Faculty of Science, Kafr El-Sheikh University, Kafr El-Sheikh, Egypt

\*Corresponding author, Email: [saeed\\_elashram@yahoo.com](mailto:saeed_elashram@yahoo.com)(SE)

**Supplementary material for “Exploring the microbial community (microflora) associated with ovine *Haemonchus contortus* (macroflora) field strains”**

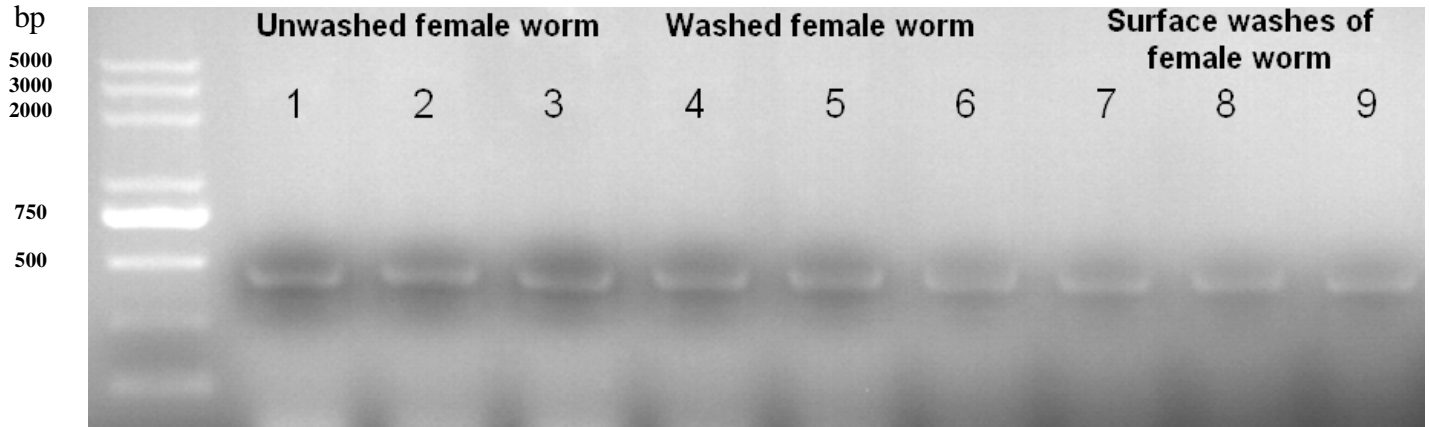

**Supplementary Figure S1: GoldView™ Nucleic Acid Stained 1.5% Agarose gel of V3-V4 region of 16S rRNA gene amplified product of unwashed an individual female worm (1, 2 and 3), washed an individual female worm (5, 6 and 7) and surface washes of an individual female worm (7, 8 and 9). Lane 1: Direct-load™ Star Marker Plus (D2000 Plus); GenStar Biosolutions Co. Ltd, Beijing, China.**

Supplementary Table S1: An average bacterial composition associated with *H. contortus* adult female worms using amplification of V3-V4 hypervariable region of bacterial 16S rRNA gene sequence.

|                                 | V3-V4 region                       |                                  |                                                  |
|---------------------------------|------------------------------------|----------------------------------|--------------------------------------------------|
|                                 | Unwashed female worms <sup>a</sup> | Washed female Worms <sup>a</sup> | Washing solutions from female worms <sup>a</sup> |
|                                 | (Average, ±SD)                     | (Average, ±SD)                   | (Average, ±SD)                                   |
| <i>Anaerovibrio</i>             | 3.77E-03 ± 3.71E-04                | 0 ± 0                            | 1.21E-03 ± 0.0003418                             |
| <i>Bacillus</i>                 | 1.48E-03 ± 1.04E-04                | 0.00163131 ± 0.00015272          | 0.00E+00 ± 0                                     |
| <i>Anaerotruncus</i>            | 2.57E-03 ± 2.56E-04                | 0 ± 0                            | 8.24E-04 ± 0.000233                              |
| <i>Oribacterium</i>             | 5.21E-03 ± 5.17E-04                | 0 ± 0                            | 1.67E-03 ± 0.0004729                             |
| <i>Ruminobacter</i>             | 2.36E-03 ± 2.36E-04                | 0 ± 0                            | 7.57E-04 ± 0.0002131                             |
| <i>Mogibacterium</i>            | 2.36E-03 ± 2.36E-04                | 0 ± 0                            | 7.57E-04 ± 0.0002131                             |
| <i>Acetitomaculum</i>           | 8.17E-03 ± 8.13E-04                | 0 ± 0                            | 2.62E-03 ± 0.0007451                             |
| <i>Moryella</i>                 | 1.45E-02 ± 1.46E-03                | 0 ± 0                            | 4.64E-03 ± 0.001318                              |
| <i>Achromobacter</i>            | 2.52E-02 ± 1.77E-03                | 0.02773495 ± .002593656          | 0.00E+00 ± 0                                     |
| <i>Kroppenstedtia</i>           | 7.41E-03 ± 5.20E-04                | 0.00815722 ± 0.00076303          | 0.00E+00 ± 0                                     |
| <i>Stenotrophomonas</i>         | 4.44E-03 ± 3.12E-04                | 0.004894266 ± 0.0004577          | 0.00E+00 ± 0                                     |
| <i>Butyrivibrio</i>             | 5.39E-02 ± 5.37E-03                | 0 ± 0                            | 1.73E-02 ± 0.0049359                             |
| <i>Candidatus_Saccharimonas</i> | 4.85E-03 ± 4.82E-04                | 0 ± 0                            | 1.56E-03 ± 0.0004407                             |
| <i>Intestinimonas</i>           | 1.48E-03 ± 1.04E-04                | 0.00163131 ± 0.00015272          | 0.00E+00 ± 0                                     |
| <i>Aeriscardovia</i>            | 2.22E-02 ± 1.56E-03                | 0.02447166 ± 0.00228877          | 0.00E+00 ± 0                                     |
| <i>Saccharofermentans</i>       | 2.41E-02 ± 2.41E-03                | 0 ± 0                            | 7.72E-03 ± 0.0021724                             |
| <i>Prevotella</i>               | 9.78E-01 ± 9.73E-02                | 0 ± 0                            | 3.14E-01 ± 0.0888669                             |
| <i>Pseudomonas</i>              | 1.06E+00 ± 7.44E-02                | 1.16812319 ±                     | 0.00E+00 ± 0                                     |

|                             |                     |                            |                          |
|-----------------------------|---------------------|----------------------------|--------------------------|
|                             |                     | 0.10924532                 |                          |
| <i>Brevundimonas</i>        | 1.48E-03 ± 1.04E-04 | 0.00163131 ±<br>0.00015272 | 0.00E+00 ± 0             |
| <i>Ochrobactrum</i>         | 1.54E+00 ± 1.08E-01 | 1.699978513 ±<br>0.1589851 | 0.00E+00 ± 0             |
| <i>Rhizobium</i>            | 1.48E-03 ± 1.04E-04 | 0.00163131 ±<br>0.00015272 | 0.00E+00 ± 0             |
| <i>Sphingomonas</i>         | 1.48E-03 ± 1.04E-04 | 0.00163131 ±<br>0.00015272 | 0.00E+00 ± 0             |
| <i>Anaerosporebacter</i>    | 3.83E-03 ± 3.82E-04 | 0 ± 0                      | 1.23E-03 ± 0.0003514     |
| <i>Lentibacillus</i>        | 4.44E-03 ± 3.12E-04 | 0.004894266 ±<br>0.000458  | 0.00E+00 ± 0             |
| <i>Atopobium</i>            | 4.44E-03 ± 3.12E-04 | 0.004894266 ±<br>0.0004577 | 0.00E+00 ± 0             |
| <i>Luteibacter</i>          | 2.96E-03 ± 2.08E-04 | 0.003262955 ± 0.000305     | 0.00E+00 ± 0             |
| <i>Ruminococcus</i>         | 1.76E-01 ± 1.24E-02 | 0.19414332 ±<br>0.01815669 | 0.00E+00 ± 0             |
| <i>Selenomonas</i>          | 6.35E-03 ± 6.27E-04 | 0 ± 0                      | 2.04E-03 ± 0.0005729     |
| <i>Succiniclasticum</i>     | 8.91E-02 ± 8.83E-03 | 0 ± 0                      | 2.86E-02 ± 0.0080934     |
| <i>Succinivibrio</i>        | 5.54E-02 ± 5.52E-03 | 0 ± 0                      | 1.78E-02 ±<br>0.0050292  |
| <i>Lactobacillus</i>        | 1.48E-03 ± 1.04E-04 | 0.00163131 ±<br>0.00015272 | 0.00E+00 ± 0             |
| <i>Pyramidobacter</i>       | 4.43E-03 ± 4.41E-04 | 0 ± 0                      | 1.42E-03 ± 0.0004029     |
| <i>Delftia</i>              | 2.96E-03 ± 2.08E-04 | 0.003262955 ± 0.000305     | 0.00E+00 ± 0             |
| <i>Acinetobacter</i>        | 4.44E-03 ± 3.12E-04 | 0.004894266 ±<br>0.0004577 | 0.00E+00 ± 0             |
| <i>Bacteroides</i>          | 2.81E-02 ± 2.76E-03 | 0 ± 0                      | 9.00E-03 ± 0.0025395     |
| <i>Marvinbryantia</i>       | 4.16E-03 ± 4.11E-04 | 0 ± 0                      | 1.34E-03 ± 0.00038       |
| <i>Coprococcus</i>          | 4.07E-03 ± 4.01E-04 | 0 ± 0                      | 1.31E-03 ± 0.0003707     |
| <i>Mycoplasma</i>           | 4.00E-02 ± 2.81E-03 | 0.044049058 ±<br>0.0041198 | 0.00E+00 ± 0             |
| <i>Arthrobacter</i>         | 2.99E-05 ± 2.96E-06 | 0 ± 0                      | 9.59E-06 ± 2.727E-<br>06 |
| <i>Pseudaminobacter</i>     | 1.48E-03 ± 1.04E-04 | 0.00163131 ±<br>0.00015272 | 0.00E+00 ± 0             |
| <i>Flavonifractor</i>       | 4.44E-03 ± 3.12E-04 | 0.004894266 ±<br>0.0004577 | 0.00E+00 ± 0             |
| <i>Blautia</i>              | 3.11E-03 ± 3.11E-04 | 0 ± 0                      | 9.98E-04 ± 0.0002823     |
| <i>Staphylococcus</i>       | 5.93E-03 ± 4.16E-04 | 0.00652591 ±<br>0.00061032 | 0.00E+00 ± 0             |
| <i>Incertae_Sedis</i>       | 4.07E-02 ± 4.06E-03 | 0 ± 0                      | 1.31E-02 ± 0.0037072     |
| <i>Aquamicrobium</i>        | 1.48E-03 ± 1.04E-04 | 0.00163131 ±<br>0.00015272 | 0.00E+00 ± 0             |
| <i>Syntrophococcus</i>      | 4.67E-03 ± 4.62E-04 | 0 ± 0                      | 1.50E-03 ± 0.0004236     |
| <i>Escherichia-Shigella</i> | 2.67E+01 ± 1.87E+00 | 29.4119116 ±<br>2.75065773 | 0.00E+00 ± 0             |
| <i>RC9_gut_group</i>        | 2.96E-03 ± 2.08E-04 | 0.003262955 ± 0.000305     | 0.00E+00 ± 0             |
| <i>Desulfovibrio</i>        | 4.49E-03 ± 4.47E-04 | 0 ± 0                      | 1.44E-03 ± 0.0004122     |
| <i>Shinella</i>             | 2.96E-03 ± 2.08E-04 | 0.003262955 ± 0.000305     | 0.00E+00 ± 0             |
| <i>Thalassospira</i>        | 1.20E-03 ± 1.20E-04 | 0 ± 0                      | 3.84E-04 ± 0.0001087     |
| <i>Shuttleworthia</i>       | 1.08E-02 ± 1.07E-03 | 0 ± 0                      | 3.45E-03 ± 0.0009794     |
| <i>Catonella</i>            | 8.98E-04 ± 8.93E-05 | 0 ± 0                      | 2.88E-04 ± 8.15E-05      |

<sup>a</sup>Data represent an average value from three female adult worm (each worm come from different sheep on one farm) ± standard deviation (SD).

Supplementary Table S2: Alpha diversity analysis of *H. contortus* microbiome based on 16S rRNA gene sequence (V3-V4) of *H. contortus* life-cycle stages.

|               | Shannon<br>Ave. $\pm$ SD <sup>a</sup> | Chao1<br>Ave. $\pm$ SD <sup>a</sup> | Good's coverage<br>Ave. $\pm$ SD <sup>a</sup> | PD whole tree<br>Ave. $\pm$ SD <sup>a</sup> | Observed species<br>Ave. $\pm$ SD <sup>a</sup> |
|---------------|---------------------------------------|-------------------------------------|-----------------------------------------------|---------------------------------------------|------------------------------------------------|
| <b>Eggs</b>   | 1.447 $\pm$ 0.003                     | 3.35 $\pm$ 0.05                     | 0.92 $\pm$ 0.002                              | 0.36 $\pm$ 0.003                            | 3.3 $\pm$ 0.01                                 |
|               | 1.776 $\pm$ 0.002                     | 24 $\pm$ 0.1                        | 0.982 $\pm$ 0.001                             | 4.077 $\pm$ 0.007                           | 13.6 $\pm$ 0.3                                 |
|               | 1.782 $\pm$ 0.002                     | 26.743 $\pm$ 0.4                    | 0.99 $\pm$ 0.002                              | 5.674 $\pm$ 0.004                           | 17.9 $\pm$ 0.1                                 |
|               | 1.807 $\pm$ 0.007                     | 25.752 $\pm$ 0.5                    | 0.994 $\pm$ 0.004                             | 5.723 $\pm$ 0.003                           | 19.8 $\pm$ 0.2                                 |
|               | 1.829 $\pm$ 0.007                     | 31.796 $\pm$ 0.1                    | 0.994 $\pm$ 0.003                             | 6.954 $\pm$ 0.004                           | 24.1 $\pm$ 0.1                                 |
|               | 1.828 $\pm$ 0.006                     | 36.465 $\pm$ 0.6                    | 0.995 $\pm$ 0.002                             | 7.45 $\pm$ 0.05                             | 26 $\pm$ 0.2                                   |
|               | 1.813 $\pm$ 0.003                     | 41.645 $\pm$ 0.4                    | 0.995 $\pm$ 0.004                             | 7.622 $\pm$ 0.01                            | 28.6 $\pm$ 0.3                                 |
|               | 1.811 $\pm$ 0.001                     | 38.813 $\pm$ 0.1                    | 0.997 $\pm$ 0.002                             | 7.64 $\pm$ 0.04                             | 27.8 $\pm$ 0.3                                 |
|               | 1.813 $\pm$ 0.003                     | 43.134 $\pm$ 0.3                    | 0.997 $\pm$ 0.004                             | 7.906 $\pm$ 0.006                           | 29.9 $\pm$ 0.3                                 |
|               | 1.803 $\pm$ 0.003                     | 39.61 $\pm$ 0.1                     | 0.997 $\pm$ 0.006                             | 7.858 $\pm$ 0.008                           | 30 $\pm$ 0.7                                   |
|               | 1.815 $\pm$ 0.005                     | 41.055 $\pm$ 0.14                   | 0.997 $\pm$ 0.005                             | 8.274 $\pm$ 0.004                           | 31.5 $\pm$ 0.4                                 |
| <b>Larvae</b> | 2.839 $\pm$ 0.006                     | 24.1 $\pm$ 0.02                     | 0.31 $\pm$ 0.001                              | 3.06 $\pm$ 0.06                             | 3.3 $\pm$ 0.01                                 |
|               | 4.824 $\pm$ 0.004                     | 97.442 $\pm$ 0.4                    | 0.93 $\pm$ 0.03                               | 8.878 $\pm$ 0.008                           | 13.6 $\pm$ 0.3                                 |
|               | 4.986 $\pm$ 0.005                     | 109.46 $\pm$ 0.6                    | 0.966 $\pm$ 0.02                              | 10.251 $\pm$ 0.01                           | 17.9 $\pm$ 0.1                                 |
|               | 5.006 $\pm$ 0.006                     | 113.016 $\pm$ 0.25                  | 0.98 $\pm$ 0.01                               | 10.747 $\pm$ 0.01                           | 19.8 $\pm$ 0.2                                 |
|               | 5.03 $\pm$ 0.03                       | 114.136 $\pm$ 0.3                   | 0.987 $\pm$ 0.002                             | 11.12 $\pm$ 0.01                            | 24.1 $\pm$ 0.1                                 |
|               | 5.059 $\pm$ 0.008                     | 115.011 $\pm$ 0.17                  | 0.992 $\pm$ 0.002                             | 11.406 $\pm$ 0.006                          | 26 $\pm$ 0.2                                   |
|               | 5.07 $\pm$ 0.07                       | 112.606 $\pm$ 0.6                   | 0.995 $\pm$ 0.003                             | 11.562 $\pm$ 0.01                           | 28.6 $\pm$ 0.3                                 |
|               | 5.07 $\pm$ 0.02                       | 112.757 $\pm$ 0.2                   | 0.997 $\pm$ 0.002                             | 11.625 $\pm$ 0.01                           | 27.8 $\pm$ 0.3                                 |
|               | 5.074 $\pm$ 0.004                     | 112.115 $\pm$ 0.15                  | 0.999 $\pm$ 0.001                             | 11.656 $\pm$ 0.01                           | 29.9 $\pm$ 0.3                                 |
|               | 5.065 $\pm$ 0.001                     | 112.186 $\pm$ 0.18                  | 0.999 $\pm$ 0.001                             | 11.683 $\pm$ 0.01                           | 30 $\pm$ 0.7                                   |
|               | 5.07 $\pm$ 0.02                       | 112 $\pm$ 0.1                       | 1 $\pm$ 0.001                                 | 11.683 $\pm$ 0.01                           | 31.5 $\pm$ 0.4                                 |
| <b>Adults</b> | 0.368 $\pm$ 0.003                     | 1.8 $\pm$ 0.1                       | 0.94 $\pm$ 0.0001                             | 0.315 $\pm$ 0.004                           | 1.8 $\pm$ 0.01                                 |
|               | 0.711 $\pm$ 0.001                     | 9.85 $\pm$ 0.5                      | 0.992 $\pm$ 0.002                             | 1.837 $\pm$ 0.005                           | 6.8 $\pm$ 0.2                                  |
|               | 0.766 $\pm$ 0.003                     | 18.975 $\pm$ 0.5                    | 0.992 $\pm$ 0.001                             | 5.001 $\pm$ 0.008                           | 11.5 $\pm$ 0.4                                 |
|               | 0.78 $\pm$ 0.02                       | 21.945 $\pm$ 0.1                    | 0.995 $\pm$ 0.004                             | 4.896 $\pm$ 0.006                           | 12.6 $\pm$ 0.3                                 |
|               | 0.765 $\pm$ 0.004                     | 26.013 $\pm$ 0.1                    | 0.995 $\pm$ 0.003                             | 6.387 $\pm$ 0.007                           | 15.7 $\pm$ 0.2                                 |
|               | 0.761 $\pm$ 0.001                     | 25.995 $\pm$ 0.4                    | 0.996 $\pm$ 0.002                             | 6.764 $\pm$ 0.004                           | 16.7 $\pm$ 0.3                                 |
|               | 0.772 $\pm$ 0.002                     | 29.268 $\pm$ 0.1                    | 0.996 $\pm$ 0.001                             | 6.964 $\pm$ 0.003                           | 18.5 $\pm$ 0.4                                 |

|  |                    |                   |                     |                    |                 |
|--|--------------------|-------------------|---------------------|--------------------|-----------------|
|  | <b>0.769±0.004</b> | <b>34.418±0.1</b> | <b>0.997±0.002</b>  | <b>7.534±0.004</b> | <b>19.6±0.4</b> |
|  | <b>0.767±0.005</b> | <b>33.54±0.4</b>  | <b>0.997±0.001</b>  | <b>8.405±0.005</b> | <b>21.2±0.2</b> |
|  | <b>0.79±0.009</b>  | <b>31.303±0.1</b> | <b>0.997±0.002</b>  | <b>8.176±0.006</b> | <b>21.3±0.2</b> |
|  | <b>0.788±0.003</b> | <b>39.218±0.1</b> | <b>0.997±0.0005</b> | <b>8.44±0.04</b>   | <b>24.3±0.3</b> |

<sup>a</sup>Data represent average values from pooled populations (i.e from each sheep) of eggs/larvae/adults (male and female) come from three different sheep ± standard deviation (SD).

Supplementary Table S3: Alpha diversity analysis of *H. contortus* microbiome based on 16S rRNA gene sequence (V5-V7) of *H. contortus* life-cycle stages.

|                   | Shannon Ave. $\pm$ SD <sup>a</sup> | Chao1 Average. $\pm$ SD <sup>a</sup> | Good's coverage Ave. $\pm$ SD <sup>a</sup> | PD whole tree Ave. $\pm$ SD <sup>a</sup> | Observed species Ave. $\pm$ SD <sup>a</sup> |                |
|-------------------|------------------------------------|--------------------------------------|--------------------------------------------|------------------------------------------|---------------------------------------------|----------------|
| Eggs              | 0.255 $\pm$ 0.004                  | 1.6 $\pm$ 0.03                       | 0.96 $\pm$ 0.005                           | 0.36 $\pm$ 0.01                          | 1.5 $\pm$ 0.04                              |                |
|                   | 0.543 $\pm$ 0.003                  | 10.95 $\pm$ 0.01                     | 0.997 $\pm$ 0.0003                         | 1.225 $\pm$ 0.005                        | 8.7 $\pm$ 0.06                              |                |
|                   | 0.519 $\pm$ 0.003                  | 17.783 $\pm$ 0.007                   | 0.997 $\pm$ 0.0004                         | 1.866 $\pm$ 0.006                        | 11.7 $\pm$ 0.055                            |                |
|                   | 0.52 $\pm$ 0.005                   | 25.483 $\pm$ 0.008                   | 0.997 $\pm$ 0.0003                         | 1.749 $\pm$ 0.006                        | 13.4 $\pm$ 0.04                             |                |
|                   | 0.507 $\pm$ 0.004                  | 20.868 $\pm$ 0.009                   | 0.998 $\pm$ 0.0004                         | 2.381 $\pm$ 0.009                        | 15.4 $\pm$ 0.065                            |                |
|                   | 0.52 $\pm$ 0.004                   | 27.928 $\pm$ 0.009                   | 0.998 $\pm$ 0.0003                         | 2.342 $\pm$ 0.008                        | 18.4 $\pm$ 0.06                             |                |
|                   | 0.528 $\pm$ 0.0015                 | 30.31 $\pm$ 0.01                     | 0.998 $\pm$ 0.0003<br>5                    | 2.631 $\pm$ 0.009                        | 19 $\pm$ 0.07                               |                |
|                   | 0.517 $\pm$ 0.002                  | 29.69 $\pm$ 0.01                     | 0.998 $\pm$ 0.0003<br>6                    | 2.584 $\pm$ 0.007                        | 20.2 $\pm$ 0.02                             |                |
|                   | 0.523 $\pm$ 0.003                  | 27.249 $\pm$ 0.009                   | 0.999 $\pm$ 0.0005                         | 3.097 $\pm$ 0.01                         | 21.5 $\pm$ 0.04                             |                |
|                   | 0.519 $\pm$ 0.004                  | 29.524 $\pm$ 0.008                   | 0.999 $\pm$ 0.0004                         | 2.65 $\pm$ 0.08                          | 22.2 $\pm$ 0.01                             |                |
|                   | 0.512 $\pm$ 0.002                  | 33.372 $\pm$ 0.008                   | 0.999 $\pm$ 0.0002                         | 3.108 $\pm$ 0.008                        | 22.4 $\pm$ 0.03                             |                |
|                   | Larvae                             | 1.168 $\pm$ 0.006                    | 4.85 $\pm$ 0.01                            | 0.81 $\pm$ 0.004                         | 0.663 $\pm$ 0.003                           | 3.3 $\pm$ 0.03 |
|                   |                                    | 2.031 $\pm$ 0.009                    | 41.501 $\pm$ 0.001                         | 0.987 $\pm$ 0.0007                       | 8.222 $\pm$ 0.01                            | 32 $\pm$ 0.05  |
| 2.058 $\pm$ 0.009 |                                    | 43.685 $\pm$ 0.012                   | 0.995 $\pm$ 0.0006                         | 9.648 $\pm$ 0.011                        | 37.9 $\pm$ 0.06                             |                |
| 2.067 $\pm$ 0.005 |                                    | 44.309 $\pm$ 0.004                   | 0.997 $\pm$ 0.0007                         | 10.924 $\pm$ 0.011                       | 41.4 $\pm$ 0.02                             |                |
| 2.086 $\pm$ 0.006 |                                    | 46.844 $\pm$ 0.014                   | 0.998 $\pm$ 0.0009                         | 11.38 $\pm$ 0.01                         | 43.2 $\pm$ 0.05                             |                |
| 2.094 $\pm$ 0.004 |                                    | 48.76 $\pm$ 0.01                     | 0.998 $\pm$ 0.0008                         | 11.662 $\pm$ 0.012                       | 44.6 $\pm$ 0.04                             |                |
| 2.073 $\pm$ 0.013 |                                    | 49.176 $\pm$ 0.009                   | 0.999 $\pm$ 0.0006                         | 11.789 $\pm$ 0.01                        | 45.7 $\pm$ 0.04                             |                |
| 2.081 $\pm$ 0.009 |                                    | 47.145 $\pm$ 0.011                   | 0.999 $\pm$ 0.0008                         | 11.799 $\pm$ 0.01                        | 45.6 $\pm$ 0.05                             |                |
| 2.078 $\pm$ 0.008 |                                    | 48.098 $\pm$ 0.011                   | 0.999 $\pm$ 0.0009                         | 11.955 $\pm$ 0.011                       | 46.5 $\pm$ 0.03                             |                |
| 2.082 $\pm$ 0.008 |                                    | 47.537 $\pm$ 0.012                   | 1 $\pm$ 0.001                              | 11.953 $\pm$ 0.009                       | 46.7 $\pm$ 0.05                             |                |
| 2.083 $\pm$ 0.007 |                                    | 47.75 $\pm$ 0.01                     | 1 $\pm$ 0.003                              | 11.976 $\pm$ 0.009                       | 47 $\pm$ 0.06                               |                |
| Adults            |                                    | 0.373 $\pm$ 0.001                    | 1.6 $\pm$ 0.02                             | 0.97 $\pm$ 0.01                          | 0.391 $\pm$ 0.001                           | 1.6 $\pm$ 0.01 |
|                   |                                    | 0.709 $\pm$ 0.002                    | 16.883 $\pm$ 0.01                          | 0.994 $\pm$ 0.004                        | 3.464 $\pm$ 0.003                           | 9.1 $\pm$ 0.07 |
|                   | 0.724 $\pm$ 0.003                  | 23.842 $\pm$ 0.012                   | 0.996 $\pm$ 0.003                          | 4.462 $\pm$ 0.002                        | 12.7 $\pm$ 0.02                             |                |
|                   | 0.723 $\pm$ 0.003                  | 23.01 $\pm$ 0.01                     | 0.997 $\pm$ 0.002                          | 5.929 $\pm$ 0.005                        | 15.3 $\pm$ 0.04                             |                |
|                   | 0.731 $\pm$ 0.01                   | 24.768 $\pm$ 0.011                   | 0.998 $\pm$ 0.001                          | 6.355 $\pm$ 0.005                        | 16.4 $\pm$ 0.08                             |                |
|                   | 0.746 $\pm$ 0.013                  | 28.73 $\pm$ 0.01                     | 0.998 $\pm$ 0.001                          | 7.444 $\pm$ 0.004                        | 20.6 $\pm$ 0.07                             |                |
|                   | 0.737 $\pm$ 0.01                   | 30.32 $\pm$ 0.01                     | 0.998 $\pm$ 0.001                          | 7.804 $\pm$ 0.004                        | 20.5 $\pm$ 0.06                             |                |
|                   | 0.737 $\pm$ 0.011                  | 32.829 $\pm$ 0.011                   | 0.998 $\pm$ 0.001                          | 8.216 $\pm$ 0.006                        | 22.1 $\pm$ 0.08                             |                |
|                   | 0.74 $\pm$ 0.01                    | 32.424 $\pm$ 0.011                   | 0.998 $\pm$ 0.001                          | 8.516 $\pm$ 0.006                        | 24.7 $\pm$ 0.065                            |                |
|                   | 0.741 $\pm$ 0.011                  | 39.875 $\pm$ 0.012                   | 0.999 $\pm$ 0.0005                         | 8.555 $\pm$ 0.005                        | 25.6 $\pm$ 0.057                            |                |
| 0.736 $\pm$ 0.007 | 39.86 $\pm$ 0.01                   | 0.999 $\pm$ 0.0006                   | 9.256 $\pm$ 0.006                          | 26.7 $\pm$ 0.056                         |                                             |                |

<sup>a</sup>Data represent average values from pooled populations (i.e from each sheep) of eggs/larvae/adults (male and female) come from three different sheep  $\pm$  standard deviation (SD) (i.e. each cluster represents a sheep)  $\pm$  standard deviation (SD)

Supplementary Table S4: Ovine abomasal microbiome composition at the genus level in the context of *Haemonchus* infection.

| Genus                                                | Control group <sup>a</sup> | 7-day post-infection group <sup>a</sup> | 50-day post-infection group <sup>a</sup> |
|------------------------------------------------------|----------------------------|-----------------------------------------|------------------------------------------|
| <i>Achromobacter</i>                                 | 0                          | 0.4862853±0.00103244                    | 0                                        |
| <i>Solobacterium</i>                                 | 0.2671057±0.000298942      | 0.6483818±0.001376589                   | 0.3896459±0.000268505                    |
| <i>Desulfobulbus</i>                                 | 0                          | 0.4862853±0.00103244                    | 0.08646436±0.0000595825                  |
| <i>Delftia</i>                                       | 0                          | 0.2161007±0.000458807                   | 0                                        |
| <i>Clostridium_sensu_stricto_1</i>                   | 0                          | 0.1080504±0.000229403                   | 0                                        |
| <i>Chryseobacterium</i>                              | 0                          | 8.266853±0.01755148                     | 0                                        |
| <i>Lysinimonas</i>                                   | 0                          | 0.1080504±0.000229403                   | 0                                        |
| <i>Anaerotruncus</i>                                 | 1.468376±0.001643391       | 0.4322517±0.00091772                    | 3.723269±0.0025657                       |
| <i>Kineococcus</i>                                   | 0                          | 0.1080504±0.000229403                   | 0                                        |
| <i>Roseburia</i>                                     | 9.611181±0.01075673        | 5.673331±0.01204513                     | 0.04323218±0.0000297912                  |
| <i>Flavonifractor</i>                                | 70.748970±0.07918149       | 49.006770±0.104047                      | 197.722900±0.1362506                     |
| <i>Oribacterium</i>                                  | 2.358299±0.002639383       | 3.187871±0.006768217                    | 7.533127±0.005191069                     |
| <i>Ruminobacter</i>                                  | 6.095981±0.006822556       | 2.701586±0.005735777                    | 3.420212±0.002356864                     |
| <i>Weissella</i>                                     | 0                          | 3.187871±0.006768217                    | 0.04323218±0.0000297912                  |
| <i>possible_genus_Sk003-Sk004</i>                    | 0                          | 0.1080504±0.000229403                   | 0                                        |
| <i>Mogibacterium</i>                                 | 6.985904±0.007818549       | 2.107238±0.004473908                    | 5.931254±0.00408722                      |
| <i>Acetitomaculum</i>                                | 2.936749±0.003286778       | 2.647552±0.005621058                    | 11.819220±0.008144608                    |
| <i>Moryella</i>                                      | 2.002330±0.002240986       | 9.671676±0.02053408                     | 20.910920±0.01440969                     |
| <i>Mucilaginibacter</i>                              | 0                          | 0.1080504±0.000229403                   | 0                                        |
| <i>Modestobacter</i>                                 | 0                          | 0.1080504±0.000229403                   | 0                                        |
| <i>Myroides</i>                                      | 0.0444619±0.0000497613     | 0.3241511±0.00068821                    | 0                                        |
| <i>Syntrophomonas</i>                                | 0.1333857±0.000149284      | 0                                       | 0.08646436±0.0000595825                  |
| <i>Sanguibacter</i>                                  | 0                          | 0.3241511±0.00068821                    | 0                                        |
| <i>Bosea</i>                                         | 0                          | 0.3781763±0.000802912                   | 0                                        |
| <i>Howardella</i>                                    | 0.4449633±0.000497998      | 0.1080504±0.000229403                   | 0.5628193±0.000387838                    |
| <i>Clostridiales_bacterium_canine_oral_taxon_162</i> | 0.1333857±0.000149284      | 0.05402518±0.000114702                  | 0                                        |
| <i>Butyrivibrio</i>                                  | 35.285490±0.03949115       | 151.775100±0.322236                     | 77.928890±0.0537007                      |
| <i>Comamonas</i>                                     | 0.0444619±0.0000497613     | 19.451420±0.0412976                     | 0                                        |
| <i>Methylobacterium</i>                              | 0                          | 0.4862853±0.00103244                    | 0                                        |
| <i>Pseudoramibacter</i>                              | 0                          | 0.1620755±0.000344105                   | 0                                        |
| <i>Patulibacter</i>                                  | 0                          | 0.7024111±0.0014913                     | 0                                        |
| <i>Brevibacillus</i>                                 | 0.0444619±0.0000497613     | 0.05402518±0.000114702                  | 0                                        |
| <i>Janthinobacterium</i>                             | 0                          | 0.7564447±0.001606019                   | 0                                        |
| <i>Campylobacter</i>                                 | 0.0889238±0.0000995226     | 0.3241511±0.00068821                    | 0.04323218±0.0000297912                  |
| <i>Solibacillus</i>                                  | 0                          | 0                                       | 0.2597282±0.000178978                    |
| <i>Wohlfahrtiimonas</i>                              | 0.1778476±0.000199045      | 0                                       | 0.1300317±0.0000896047                   |
| <i>Stenotrophomonas</i>                              | 0                          | 6.807998±0.01445416                     | 0.08646436±0.0000595825                  |
| <i>U29-B03</i>                                       | 2.091321±0.002340584       | 0.810474±0.00172073                     | 11.646040±0.008025272                    |
| <i>Olsenella</i>                                     | 0                          | 0.3781763±0.000802912                   | 0.5628193±0.000387838                    |
| <i>Rhizobium</i>                                     | 0                          | 5.295109±0.01124213                     | 0                                        |
| <i>Paenibacillus</i>                                 | 0.3559693±0.000398397      | 0.5943482±0.00126187                    | 0.3463501±0.000238669                    |
| <i>Psychrobacter</i>                                 | 0                          | 0.1080504±0.000229403                   | 0                                        |
| <i>Actinobaculum</i>                                 | 0.0444619±0.0000497613     | 0.2161007±0.000458807                   | 0.04323218±0.0000297912                  |
| <i>Paraprevotella</i>                                | 0.2671057±0.000298942      | 1.242730±0.002638459                    | 0.2597282±0.000178978                    |



|                                                            |                        |                        |                         |
|------------------------------------------------------------|------------------------|------------------------|-------------------------|
| <i>Gluconobacter</i>                                       | 0                      | 0.2701259±0.000573508  | 0                       |
| <i>Bacillus</i>                                            | 0.4894587±0.000547797  | 1.945141±0.004129758   | 0.6494077±0.000447506   |
| <i>Fibrobacter</i>                                         | 93.264050±0.1043801    | 18.208690±0.03865914   | 38.271740±0.02637301    |
| <i>Candidatus_Captivus</i>                                 | 0.0444619±0.0000497613 | 0.05402518±0.000114702 | 0                       |
| <i>Candidatus_Saccharimonas</i>                            | 11.391030±0.01274872   | 11.076500±0.02351669   | 7.013600±0.004833064    |
| <i>Empedobacter</i>                                        | 0                      | 9.887806±0.02099295    | 0                       |
| <i>Saccharofermentans</i>                                  | 21.224690±0.02375445   | 21.504620±0.04565679   | 34.894820±0.02404598    |
| <i>Serratia</i>                                            | 0                      | 0.7024111±0.0014913    | 0                       |
| <i>Kandleria</i>                                           | 0                      | 27.880370±0.05919323   | 0                       |
| <i>Bordetella</i>                                          | 0                      | 0.1080504±0.000229403  | 0                       |
| <i>Duganella</i>                                           | 0                      | 0.2161007±0.000458807  | 0                       |
| <i>Citrobacter</i>                                         | 0.0444619±0.0000497613 | 14.210340±0.0301702    | 0                       |
| <i>Oscillibacter</i>                                       | 2.135819±0.002390386   | 5.511234±0.01170099    | 1.342108±0.000924845    |
| <i>Megasphaera</i>                                         | 0                      | 2.809649±0.005965207   | 0                       |
| <i>RC9_gut_group</i>                                       | 216.429600±0.2422256   | 93.691000±0.1989168    | 112.260900±0.07735885   |
| <i>Victivallis</i>                                         | 11.702500±0.01309732   | 14.480500±0.03074377   | 0.5628193±0.000387838   |
| <i>Sphingobium</i>                                         | 0                      | 0.4862853±0.00103244   | 0                       |
| <i>dgA-11_gut_group</i>                                    | 0.0889238±0.000095226  | 0                      | 0                       |
| <i>Bifidobacterium</i>                                     | 0.6674433±0.000746995  | 0.1620755±0.000344105  | 0.04323218±0.0000297912 |
| <i>Enterorhabdus</i>                                       | 4.983574±0.005577563   | 3.025774±0.006424067   | 4.156208±0.002864038    |
| <i>Lactococcus</i>                                         | 0.0444619±0.0000497613 | 7.240250±0.01537188    | 0                       |
| <i>Hafnia</i>                                              | 0                      | 0.3241511±0.00068821   | 0                       |
| <i>Ethanoligenens</i>                                      | 0.2671057±0.000298942  | 0                      | 0                       |
| <i>Enterobacter</i>                                        | 0                      | 9.023298±0.0191575     | 0                       |
| <i>Prevotella</i>                                          | 1288.966000±1.442597   | 2320.122000±4.925886   | 1415.318000±0.9752943   |
| <i>Selenomonas</i>                                         | 1.201397±0.001344591   | 2.431426±0.005162198   | 9.178292±0.00632475     |
| <i>Intestinimonas</i>                                      | 2.224810±0.002489983   | 1.404826±0.002982608   | 4.978789±0.003430877    |
| <i>Succiniclasticum</i>                                    | 43.294810±0.04845509   | 39.010900±0.08282463   | 128.885700±0.088815     |
| <i>Sharpea</i>                                             | 0                      | 47.493880±0.100835     | 0.3029604±0.00020877    |
| <i>Succinivibrio</i>                                       | 15.707160±0.01757929   | 27.069890±0.05747249   | 80.223460±0.05528189    |
| <i>Arcobacter</i>                                          | 0                      | 0.3781763±0.000802912  | 0                       |
| <i>SP3-e08</i>                                             | 0.9789173±0.001095594  | 0                      | 0.08646436±0.0000595825 |
| <i>Iamia</i>                                               | 0                      | 0.1620755±0.000344105  | 0                       |
| <i>Solirubrobacter</i>                                     | 0                      | 0.2161007±0.000458807  | 0                       |
| <i>Ochrobactrum</i>                                        | 0.0444619±0.0000497613 | 0.6483818±0.001376589  | 0.04323218±0.0000297912 |
| <i>Pyramidobacter</i>                                      | 0.4894587±0.000547797  | 6.753964±0.01433944    | 6.407485±0.00441539     |
| <i>Bacteroides</i>                                         | 15.707160±0.01757929   | 3.133842±0.006653506   | 40.652900±0.02801387    |
| <i>Jatrophihabitans</i>                                    | 0                      | 0.1080504±0.000229403  | 0                       |
| <i>Deltaproteobacteria_bacterium_canine_oral_taxon_266</i> | 0                      | 0.1080504±0.000229403  | 0                       |
| <i>Arthrobacter</i>                                        | 0                      | 0.9185412±0.001950169  | 0.04323218±0.0000297912 |
| <i>Treponema</i>                                           | 34.573550±0.03869435   | 33.661760±0.07146779   | 29.786150±0.0205256     |
| <i>Alloprevotella</i>                                      | 1.201397±0.001344591   | 3.728190±0.007915376   | 0.3896459±0.000268505   |
| <i>Microvirga</i>                                          | 0                      | 0.1080504±0.000229403  | 0                       |
| <i>Sphingomonas</i>                                        | 0                      | 7.240250±0.01537188    | 0                       |
| <i>Anaerovorax</i>                                         | 7.697843±0.008615343   | 3.512060±0.007456507   | 4.719027±0.003251876    |
| <i>Elusimicrobium</i>                                      | 6.896913±0.007718951   | 11.184570±0.02374612   | 2.943981±0.002028694    |
| <i>Mitsuokella</i>                                         | 0.1778476±0.000199045  | 0.2161007±0.000458807  | 2.814100±0.001939193    |
| <i>Staphylococcus</i>                                      | 0.1333857±0.000149284  | 0                      | 0.000000000000000       |

|                                            |                        |                       |                         |
|--------------------------------------------|------------------------|-----------------------|-------------------------|
| <i>Schwartzia</i>                          | 0.1333857±0.000149284  | 0                     | 3.117154±0.002148027    |
| <i>Mesorhizobium</i>                       | 0                      | 0.3781763±0.000802912 | 0                       |
| <i>Nocardioides</i>                        | 0                      | 0.3241511±0.00068821  | 0                       |
| <i>Aeromonas</i>                           | 0                      | 0.9185412±0.001950169 | 0                       |
| <i>Xanthomonas</i>                         | 0                      | 0.7564447±0.001606019 | 0                       |
| <i>Pseudobutyrvibrio</i>                   | 15.484680±0.01733029   | 12.157140±0.025811    | 4.632439±0.003192208    |
| <i>Christensenella</i>                     | 0.8009326±0.000896395  | 0.2161007±0.000458807 | 0.4762309±0.00032817    |
| <i>Actinotalea</i>                         | 0                      | 0.1080504±0.000229403 | 0                       |
| <i>Methanobrevibacter</i>                  | 0.2226438±0.000249181  | 0                     | 0                       |
| <i>Escherichia-Shigella</i>                | 0.000000000000000      | 0.1080504±0.000229403 | 0                       |
| <i>Marvinbryantia</i>                      | 2.135819±0.002390386   | 0.2701259±0.000573508 | 6.017842±0.004146888    |
| <i>Anaerofustis</i>                        | 0.3115676±0.000348703  |                       | 0.1300317±0.0000896047  |
| <i>probable_genus_10</i>                   | 7.831332±0.008764743   | 3.620127±0.007685946  | 0.9091694±0.000626508   |
| <i>Coprococcus</i>                         | 1.957835±0.002191188   | 0.9185412±0.001950169 | 5.887961±0.004057387    |
| <i>Deinococcus</i>                         | 0                      | 0.1080504±0.000229403 | 0                       |
| <i>Pseudomonas</i>                         | 0.2226438±0.000249181  | 13.129710±0.02787588  | 0.08646436±0.0000595825 |
| <i>Papillibacter</i>                       | 10.812580±0.01210132   | 0.1620755±0.000344105 | 0.3896459±0.000268505   |
| <i>Cellulomonas</i>                        | 0                      | 0.1080504±0.000229403 | 0                       |
| <i>Lapillicoccus</i>                       | 0                      | 0.1620755±0.000344105 | 0                       |
| <i>Defluviimonas</i>                       | 0                      | 0.1620755±0.000344105 | 0                       |
| <i>Streptococcus</i>                       | 1.201397±0.001344591   | 0.1620755±0.000344105 | 0.1732638±0.000119396   |
| <i>Roseomonas</i>                          | 0                      | 0.1080504±0.000229403 | 0                       |
| <i>Ruminococcus</i>                        | 107.324800±0.1201168   | 67.269490±0.1428209   | 96.069000±0.06620103    |
| <i>Denitrobacterium</i>                    | 0.1333857±0.000149284  | 0                     | 0                       |
| <i>Succinimonas</i>                        | 0.3115676±0.000348703  | 0                     | 0.04323218±0.0000297912 |
| <i>Candidatus_Hepatincola</i>              | 0.2671057±0.000298942  | 0                     | 0.1732638±0.000119396   |
| <i>Nitrobacter</i>                         | 0                      | 0.3781763±0.000802912 | 0                       |
| <i>Variovorax</i>                          | 0                      | 0.4322517±0.00091772  | 0                       |
| <i>Atopobium</i>                           | 0.8009326±0.000896395  | 5.295109±0.01124213   | 11.386280±0.00784627    |
| <i>Phocaeicola</i>                         | 0.3115676±0.000348703  | 3.187871±0.006768217  | 3.420212±0.002356864    |
| <i>Fretibacterium</i>                      | 0.3115676±0.000348703  | 2.269334±0.004818057  | 0.3029604±0.00020877    |
| <i>Quinella</i>                            | 0                      | 0                     | 0.2597282±0.000178978   |
| <i>Enhydrobacter</i>                       | 0                      | 1.674982±0.003556179  | 0                       |
| <i>Stomatobaculum</i>                      | 0.2226438±0.000249181  | 0.3781763±0.000802912 | 0                       |
| <i>Kocuria</i>                             | 0                      | 0.1620755±0.000344105 | 0                       |
| <i>Anaeroplasma</i>                        | 24.917880±0.02788782   | 4.484634±0.009521395  | 0.08646436±0.0000595825 |
| <i>Leuconostoc</i>                         | 0                      | 8.861202±0.01881335   | 0                       |
| <i>Kurthia</i>                             | 0.0444619±0.0000497613 | 0.1080504±0.000229403 | 0                       |
| <i>Soonwooa</i>                            | 0                      | 0.2701259±0.000573508 | 0                       |
| <i>Massilia</i>                            | 0                      | 0.1620755±0.000344105 | 0                       |
| <i>Oscillospira</i>                        | 0                      | 0.3781763±0.000802912 | 0.5195268±0.000358005   |
| <i>Brevundimonas</i>                       | 0                      | 1.242730±0.002638459  | 0                       |
| <i>Pedobacter</i>                          | 0                      | 0.3781763±0.000802912 | 0                       |
| <i>Sporobacter</i>                         | 0.3115676±0.000348703  | 0.1080504±0.000229403 | 0.2597282±0.000178978   |
| <i>Thalassospira</i>                       | 5.829002±0.006523757   | 11.346660±0.02409027  | 1.731754±0.001193349    |
| <i>Acinetobacter</i>                       | 0.2671057±0.000298942  | 54.193820±0.1150597   | 1.125639±0.000775676    |
| <i>SRI_bacterium_canine_oral_taxon_380</i> | 0                      | 0.6483818±0.001376589 | 0                       |
| <i>Alysiella</i>                           | 0                      | 0                     | 0.08646436±0.0000595825 |

|                                 |                        |                       |                         |
|---------------------------------|------------------------|-----------------------|-------------------------|
| <i>Lactobacillus</i>            | 0                      | 7.726535±0.01640432   | 0.04323218±0.0000297912 |
| <i>Shuttleworthia</i>           | 1.067908±0.001195191   | 0.1620755±0.000344105 | 15.585780±0.01074014    |
| <i>Possible_genus_Sk018</i>     | 1.201397±0.001344591   | 1.026604±0.002179599  | 0                       |
| <i>Pantoea</i>                  | 0                      | 0.5943482±0.00126187  | 0                       |
| <i>Devosia</i>                  | 0                      | 0.6483818±0.001376589 | 0                       |
| <i>Curtobacterium</i>           | 0                      | 2.701586±0.005735777  | 0                       |
| <i>Alkaliphilus</i>             | 0.0444619±0.0000497613 | 0.1080504±0.000229403 | 0.04323218±0.0000297912 |
| <i>Collinsella</i>              | 0                      | 0                     | 0.08646436±0.0000595825 |
| <i>Catonella</i>                | 0.1333857±0.000149284  | 0.2161007±0.000458807 | 1.298815±0.000895012    |
| <i>Enterococcus</i>             | 0.1333857±0.000149284  | 1.945141±0.004129758  | 0.1732638±0.000119396   |
| <i>Sphingobacterium</i>         | 0.0444619±0.0000497613 | 4.916886±0.01043911   | 0                       |
| <i>Aeromicrobium</i>            | 0                      | 1.134667±0.002409029  | 0                       |
| <i>Anaerosporobacter</i>        | 0.1333857±0.000149284  | 0                     | 5.541608±0.003818716    |
| <i>Lachnospira</i>              | 0                      | 0.1080504±0.000229403 | 0                       |
| <i>Desulfovibrio</i>            | 0.4004647±0.000448196  | 4.484634±0.009521395  | 6.494073±0.004475058    |
| <i>Aeriscardovia</i>            | 0.1333857±0.000149284  | 0.6483818±0.001376589 | 0.6927001±0.000477339   |
| <i>Wautersiella</i>             | 0                      | 14.642600±0.03108792  | 0                       |
| <i>Hydrogenoanaerobacterium</i> | 0.0444619±0.0000497613 | 0                     | 0.1732638±0.000119396   |
| <i>Spirochaeta</i>              | 1.112407±0.001244994   | 0.5943482±0.00126187  | 0.04323218±0.0000297912 |
| <i>Vagococcus</i>               | 0                      | 0.1620755±0.000344105 | 0                       |
| <i>Syntrophococcus</i>          | 3.515201±0.003934176   | 3.674156±0.007800657  | 6.753839±0.004654062    |
| <i>Incertae_Sedis</i>           | 29.100520±0.03256899   | 30.473890±0.06469957  | 58.836310±0.04054403    |
| <i>Acetobacter</i>              | 0                      | 1.188696±0.002523739  | 0                       |
| <i>Anaerovibrio</i>             | 0.2671057±0.000298942  | 1.242730±0.002638459  | 5.455023±0.00375905     |
| <i>Blautia</i>                  | 7.475362±0.008366346   | 8.428950±0.01789563   | 4.502558±0.003102707    |

<sup>a</sup>Each value is an average of three samples collected from three experimentally *H. contortus*-infected sheep (i.e. each sample represents a sheep) ± standard deviation (SD)

Supplementary Table S5: Ovine ruminal microbiome composition at the genus level in the context of *Haemonchus* infection.

| Genus                           | Control group <sup>a</sup> | 7-day post-infection group <sup>a</sup> | 50-day post-infection group <sup>a</sup> |
|---------------------------------|----------------------------|-----------------------------------------|------------------------------------------|
| <i>Leuconostoc</i>              | 0                          | 5.350628±0.03108216                     | 0                                        |
| <i>Denitrobacterium</i>         | 0.4538265±0.003355203      | 0                                       | 0                                        |
| <i>Wohlfahrtiimonas</i>         | 0.2475418±0.001830111      | 0                                       | 0                                        |
| <i>Bacteroides</i>              | 15.182560±0.1122468        | 0.5827417±0.003385186                   | 1.778635±0.01738169                      |
| <i>Megasphaera</i>              | 0                          | 0.3178591±0.001846465                   | 0                                        |
| <i>Lachnospira</i>              | 0                          | 0.4238122±0.002461953                   | 0.03176134±0.000310387                   |
| <i>Pseudobutyrvibrio</i>        | 40.514330±0.2995281        | 17.164390±0.09970912                    | 5.113575±0.04997235                      |
| <i>Pyramidobacter</i>           | 0                          | 0.9535774±0.005539395                   | 0.285852±0.002793485                     |
| <i>Spirochaeta</i>              | 0.1650278±0.001220074      | 0.4238122±0.002461953                   | 0.06352267±0.000620775                   |
| <i>Atopobium</i>                | 0.7838822±0.005795351      | 0.6357182±0.00369293                    | 0.190568±0.001862324                     |
| <i>Elusimicrobium</i>           | 3.176786±0.02348642        | 0.105953±0.000615488                    | 0.1270453±0.001241549                    |
| <i>Brevundimonas</i>            | 0                          | 0.3708356±0.002154209                   | 0                                        |
| <i>Succinivibrio</i>            | 41.504500±0.3068486        | 5.138722±0.02985119                     | 408.450800±3.991580                      |
| <i>Solobacterium</i>            | 0                          | 0.4767887±0.002769698                   | 0                                        |
| <i>Sphingobium</i>              | 0                          | 0.2648826±0.001538721                   | 0                                        |
| <i>Victivallis</i>              | 3.671869±0.02714664        | 16.104860±0.09355423                    | 0.06352267±0.000620775                   |
| <i>Stenotrophomonas</i>         | 0                          | 1.854178±0.01077105                     | 0                                        |
| <i>U29-B03</i>                  | 1.155195±0.008540517       | 0.3708356±0.002154209                   | 4.097213±0.04003996                      |
| <i>Pseudomonas</i>              | 0.2062848±0.001525092      | 1.748225±0.01015556                     | 0                                        |
| <i>Treponema</i>                | 43.484830±0.3214895        | 28.236480±0.1640276                     | 38.304170±0.374327                       |
| <i>Wautersiella</i>             | 0.04125696±0.000305018     | 1.695249±0.009847814                    | 0                                        |
| <i>Paracoccus</i>               | 0                          | 0.105953±0.000615488                    | 0                                        |
| <i>Candidatus_Saccharimonas</i> | 19.885850±0.1470189        | 10.330420±0.06001012                    | 1.111647±0.01086355                      |
| <i>Chryseobacterium</i>         | 0                          | 0.5297652±0.003077442                   | 0                                        |
| <i>Papillibacter</i>            | 1.155195±0.008540517       | 1.695249±0.009847814                    | 0                                        |
| <i>Ruminobacter</i>             | 0                          | 0                                       | 6.225222±0.0608359                       |
| <i>Acinetobacter</i>            | 0.2887987±0.002135129      | 12.555440±0.07293537                    | 0                                        |
| <i>Ochrobactrum</i>             | 0                          | 0.1589296±0.000923233                   | 0                                        |
| <i>Oribacterium</i>             | 2.640445±0.01952118        | 7.204807±0.04185321                     | 3.684315±0.03600492                      |
| <i>Klebsiella</i>               | 0                          | 1.801202±0.0104633                      | 0                                        |
| <i>Microvirga</i>               | 0                          | 0.105953±0.000615488                    | 0                                        |
| <i>Arthrobacter</i>             | 0                          | 0.105953±0.000615488                    | 0                                        |
| <i>Enterorhabdus</i>            | 4.208210±0.03111188        | 11.813760±0.06862696                    | 0.7305108±0.007138907                    |
| <i>RC9_gut_group</i>            | 188.503100±1.393629        | 56.049160±0.3255934                     | 15.404250±0.1505378                      |
| <i>Succiniclasticum</i>         | 60.317670±0.445937         | 34.752600±0.2018802                     | 10.195390±0.09963431                     |
| <i>probable_genus_10</i>        | 5.280891±0.03904236        | 2.330967±0.01354074                     | 0.09528401±0.000931162                   |
| <i>Photorhabdus</i>             | 0                          | 0                                       | 0.1270453±0.001241549                    |
| <i>Marvinbryantia</i>           | 0.04125696±0.000305018     | 0.05297652±0.000307744                  | 0                                        |
| <i>Syntrophococcus</i>          | 0.990167±0.007320443       | 4.026216±0.02338856                     | 0.2223294±0.002172711                    |
| <i>Sphingomonas</i>             | 0                          | 2.119061±0.01230977                     | 0                                        |

|                                        |                        |                        |                        |
|----------------------------------------|------------------------|------------------------|------------------------|
| <i>Thalassospira</i>                   | 0.6188544±0.004575277  | 1.059530±0.006154884   | 0.190568±0.001862324   |
| <i>Empedobacter</i>                    | 0                      | 1.112507±0.006462628   | 0                      |
| <i>Desulfovibrio</i>                   | 0.8663961±0.006405388  | 3.549427±0.02061886    | 1.619828±0.01582975    |
| <i>Paenibacillus</i>                   | 0.1650278±0.001220074  | 0.105953±0.000615488   | 0                      |
| <i>Incertae_Sedis</i>                  | 12.995940±0.09608082   | 21.296560±0.1237132    | 3.684315±0.03600492    |
| <i>Oscillibacter</i>                   | 0.04125696±0.000305018 | 0.3178591±0.001846465  | 0.06352267±0.000620775 |
| <i>Streptococcus</i>                   | 2.021591±0.0149459     | 0.4238122±0.002461953  | 0                      |
| <i>Selenomonas</i>                     | 10.561780±0.07808473   | 8.582196±0.04985456    | 24.487990±0.2393086    |
| <i>Gluconobacter</i>                   | 0                      | 0.105953±0.000615488   | 0                      |
| <i>Bacillus</i>                        | 0.4538265±0.003355203  | 0.2648826±0.001538721  | 0.03176134±0.000310387 |
| <i>Enterococcus</i>                    | 0.08251392±0.000610037 | 0.8476243±0.004923907  |                        |
| <i>Succinimonas</i>                    | 0                      | 0                      | 0.09528401±0.000931162 |
| <i>Methylobacterium</i>                | 0                      | 0.2119061±0.001230977  | 0                      |
| <i>Devosia</i>                         | 0                      | 1.112507±0.006462628   | 0                      |
| <i>Variovorax</i>                      | 0                      | 0.105953±0.000615488   | 0                      |
| <i>Pseudoxanthomonas</i>               | 0.08251392±0.000610037 | 0.105953±0.000615488   | 0                      |
| <i>Sphingobacterium</i>                | 0                      | 0.9006009±0.005231651  | 0                      |
| <i>Blvii28_wastewater-sludge_group</i> | 0.04125696±0.000305018 | 0                      | 0.03176134±0.000310387 |
| <i>possible_genus_Sk018</i>            | 0.6601114±0.004880295  | 2.489897±0.01446398    | 0.03176134±0.000310387 |
| <i>Alloprevotella</i>                  | 2.145362±0.01586096    | 0                      | 0.1588067±0.001551936  |
| <i>Schwartzia</i>                      | 0.9489101±0.007015425  | 0                      | 1.111647±0.01086355    |
| <i>Enhydrobacter</i>                   | 0                      | 0.3708356±0.002154209  | 0                      |
| <i>Campylobacter</i>                   | 0.2475418±0.001830111  | 0.05297652±0.000307744 | 0.06352267±0.000620775 |
| <i>Anaerobispirillum</i>               | 0.1237709±0.000915055  | 0                      | 0.2223294±0.002172711  |
| <i>Roseburia</i>                       | 9.489100±0.07015425    | 3.072638±0.01784916    | 0                      |
| <i>Faecalibacterium</i>                | 0                      | 0                      | 0.1588067±0.001551936  |
| <i>Intestinimonas</i>                  | 0.2887987±0.002135129  | 6.516112±0.03785253    | 0.2223294±0.002172711  |
| <i>Anaeroplasma</i>                    | 2.062848±0.01525092    | 4.079192±0.0236963     | 0.03176134±0.000310387 |
| <i>Comamonas</i>                       | 0.08251392±0.000610037 | 2.225014±0.01292526    | 0                      |
| <i>Rhizobium</i>                       | 0                      | 0.4238122±0.002461953  | 0                      |
| <i>Anaerotruncus</i>                   | 0.2062848±0.001525092  | 0.2119061±0.001230977  | 0                      |
| <i>Methanobrevibacter</i>              | 0.7013683±0.005185314  | 0                      | 0.03176134±0.000310387 |
| <i>Anaerovibrio</i>                    | 3.094272±0.02287639    | 3.337521±0.01938788    | 7.559198±0.07387216    |
| <i>Mogibacterium</i>                   | 3.960668±0.02928177    | 1.589296±0.009232325   | 0.3811361±0.003724647  |
| <i>Hafnia</i>                          | 0                      | 0.105953±0.000615488   | 0                      |
| <i>Weissella</i>                       | 0                      | 3.496450±0.02031112    | 0                      |
| <i>Acetitomaculum</i>                  | 0.6188544±0.004575277  | 6.357183±0.0369293     | 0.285852±0.002793485   |
| <i>Rhodopseudomonas</i>                | 0                      | 0.105953±0.000615488   | 0                      |
| <i>Kandleria</i>                       | 0                      | 0.2648826±0.001538721  | 0                      |
| <i>Desulfobulbus</i>                   | 0.08251392±0.000610037 | 0.3178591±0.001846465  | 0.1588067±0.001551936  |
| <i>Butyrivibrio</i>                    | 31.644090±0.2339492    | 101.609000±0.5902534   | 10.640050±0.1039797    |
| <i>Saccharofermentans</i>              | 8.994017±0.06649403    | 21.296560±0.1237132    | 2.159771±0.02110633    |
| <i>hoa5-07d05_gut_group</i>            | 0.08251392±0.000610037 | 0                      | 0                      |
| <i>Enterobacter</i>                    | 0                      | 6.833971±0.039699      | 0                      |

|                                            |                        |                        |                        |
|--------------------------------------------|------------------------|------------------------|------------------------|
| <i>Blautia</i>                             | 2.929244±0.02165631    | 17.111420±0.09940137   | 0.6669881±0.006518132  |
| <i>Bosea</i>                               | 0                      | 0.105953±0.000615488   | 0                      |
| <i>Paraprevotella</i>                      | 0.04125696±0.000305018 | 0.9006009±0.005231651  | 0.1270453±0.001241549  |
| <i>Fretibacterium</i>                      | 0.7838822±0.005795351  | 2.330967±0.01354074    | 0.2540907±0.002483098  |
| <i>Olsenella</i>                           | 0                      | 0.1589296±0.000923233  | 0                      |
| <i>Ruminococcus</i>                        | 60.400190±0.446547     | 74.537960±0.4329961    | 22.201180±0.2169607    |
| <i>Curtobacterium</i>                      | 0                      | 0.3178591±0.001846465  | 0                      |
| <i>Lactobacillus</i>                       | 0                      | 7.204807±0.04185321    | 0                      |
| <i>Alkaliphilus</i>                        | 0                      | 0.05297652±0.000307744 | 0.03176134±0.000310387 |
| <i>Fibrobacter</i>                         | 31.520320±0.2330341    | 5.297652±0.03077442    | 11.211750±0.1095667    |
| <i>Mesorhizobium</i>                       | 0                      | 0.105953±0.000615488   | 0                      |
| <i>Anaerovorax</i>                         | 0.7013683±0.005185314  | 1.907155±0.01107879    | 0.4128974±0.004035034  |
| <i>Flavonifractor</i>                      | 3.176786±0.02348642    | 5.456582±0.03169765    | 4.573633±0.04469576    |
| <i>Lactococcus</i>                         | 0                      | 6.675042±0.03877577    | 0                      |
| <i>Prevotella</i>                          | 2024.685000±14.968780  | 1098.574000±6.381691   | 1833.995000±17.922690  |
| <i>Aeromicrobium</i>                       | 0                      | 0.4238122±0.002461953  | 0                      |
| <i>Moryella</i>                            | 0                      | 0.1589296±0.000923233  | 0.1270453±0.001241549  |
| <i>Subdoligranulum</i>                     | 0                      | 0                      | 0.06352267±0.000620775 |
| <i>Howardella</i>                          | 2.516675±0.01860613    | 3.496450±0.02031112    | 0.4764201±0.004655809  |
| <i>Coprococcus</i>                         | 0.04125696±0.000305018 | 0.2119061±0.001230977  | 0.03176134±0.000310387 |
| <i>Shuttleworthia</i>                      | 0.4538265±0.003355203  | 0.3708356±0.002154209  | 2.255055±0.02203749    |
| <i>Veillonella</i>                         | 0                      | 0                      | 0.06352267±0.000620775 |
| <i>Candidatus_Hepaticola</i>               | 0.2475418±0.001830111  | 0                      | 0.03176134±0.000310387 |
| <i>SRI_bacterium_canine_oral_taxon_380</i> | 0                      | 0.2648826±0.001538721  | 0                      |
| <i>Quinella</i>                            | 0                      | 0                      | 0.3493747±0.00341426   |

<sup>a</sup>Each value is an average of three samples collected from three experimentally *H. contortus*-infected sheep (i.e. each sample represents a sheep) ± standard deviation (SD)

Supplementary Table S6: An average composition of significantly different microbial taxa associated with *H. contortus* eggs, larvae and adults using 16S rRNA gene (V3-V4 region). *P*-values were calculated using Kruskal-Wallis test. The level of significance was determined at  $P < 0.05$ .

| Phylum         |                          |                          |                          |                |                 |                |                 |                  |                 |
|----------------|--------------------------|--------------------------|--------------------------|----------------|-----------------|----------------|-----------------|------------------|-----------------|
| V3-V4 region   | Eggs                     | Larvae                   | Adults                   | Eggs vs adults |                 | Eggs vs larvae |                 | Larvae vs adults |                 |
|                | Median, IQR <sup>a</sup> | Median, IQR <sup>a</sup> | Median, IQR <sup>a</sup> | Chi-square     | <i>p</i> -value | Chi-square     | <i>p</i> -value | Chi-square       | <i>p</i> -value |
| Planctomycetes | 0                        | 0.3256886, 0.00233       | 0                        | 4.3548         | 0.0369          | 0              | 0               | 4.3548           | 0.0369          |
| Elusimicrobia  | 0                        | 0.1184322, 0.000847      | 0                        | 4.3548         | 0.0369          | 0              | 0               | 4.3548           | 0.0369          |
| Candidate      | 0                        | 0.1776483, 0.0012712     | 0                        | 4.3548         | 0.0369          | 0              | 0               | 4.3548           | 0.0369          |
| Firmicutes     | 0.607866, 0.00738        | 22.679767, 0.162288      | 0.153335, 0.0023912      | 3.8571         | 0.0495          | 3.8571         | 0.0495          | 3.8571           | 0.0495          |
| Bacteroidetes  | 0.11323, 0.001375        | 6.0400424, 0.04322       | 0                        | 3.8571         | 0.0495          | 4.3548         | 0.0369          | 4.3548           | 0.0369          |
| Tenericutes    | 0                        | 0                        | 0.0537668, 0.0008384     | 0              | 0               | 4.3548         | 0.0369          | 4.3548           | 0.0369          |
| Acidobacteria  | 0                        | 0.4441208, 0.003178      | 0                        | 4.3548         | 0.0369          | 0              | 0               | 4.3548           | 0.0369          |
| Spirochaetae   | 0                        | 0.2960805, 0.0021186     | 0                        | 4.3548         | 0.0369          | 0              | 0               | 4.3548           | 0.0369          |
| Proteobacteria | 36.08457, 0.43828        | 66.23321, 0.47394        | 40.639736, 0.633758      | 3.8571         | 0.0495          | 3.8571         | 0.0495          | 3.8571           | 0.0495          |
| Actinobacteria | 0.119189, 0.001448       | 0                        | 0.0358445, 0.000559      | 4.3548         | 0.0369          | 3.8571         | 0.0495          | 4.3548           | 0.0369          |

| Class               |                          |                          |                          |                |                 |                |                 |                  |                 |
|---------------------|--------------------------|--------------------------|--------------------------|----------------|-----------------|----------------|-----------------|------------------|-----------------|
| V3-V4 region        | Eggs                     | Larvae                   | Adults                   | Eggs vs adults |                 | Eggs vs larvae |                 | Larvae vs adults |                 |
|                     | Median, IQR <sup>a</sup> | Median, IQR <sup>a</sup> | Median, IQR <sup>a</sup> | Chi-square     | <i>p</i> -value | Chi-square     | <i>p</i> -value | Chi-square       | <i>p</i> -value |
| OM190               | 0                        | 0.32568856, 0.00233      | 0                        | 4.3548         | 0.0369          | 0              | 0               | 4.3548           | 0.0369          |
| Acidobacteria       | 0                        | 0.44412076, 0.00317796   | 0                        | 4.3548         | 0.0369          | 0              | 0               | 4.3548           | 0.0369          |
| Bacilli             | 0.238379, 0.002896       | 22.6797669, 0.1622882    | 0.047793, 0.0007453      | 3.8571         | 0.0495          | 3.8571         | 0.0495          | 3.8571           | 0.0495          |
| Elusimicrobia       | 0                        | 0.1184322, 0.00084746    | 0                        | 4.3548         | 0.0369          | 0              | 0               | 4.3548           | 0.0369          |
| Sphingobacteriia    | 0                        | 4.02669492, 0.02881356   | 0                        | 4.3548         | 0.0369          | 0              | 0               | 4.3548           | 0.0369          |
| Deltaproteobacteria | 0                        | 0.29608051, 0.0021186    | 0                        | 4.3548         | 0.0369          | 0              | 0               | 4.3548           | 0.0369          |
| Coriobacteriia      | 0.047676, 0.000579       | 0                        | 0.005974, 0.000093164    | 4.3548         | 0.0369          | 3.8571         | 0.0495          | 4.3548           | 0.0369          |
| Spirochaetes        | 0                        | 0.29608051, 0.0021186    | 0                        | 4.3548         | 0.0369          | 0              | 0               | 4.3548           | 0.0369          |
| Gammaproteobacteria | 28.64119, 0.34787        | 13.0571504, 0.0934322    | 38.50898, 0.60052987     | 3.8571         | 0.0495          | 3.8571         | 0.0495          | 3.8571           | 0.0495          |
| Clostridia          | 0.369487, 0.004488       | 0                        | 0.105542, 0.00164588     | 4.3548         | 0.0369          | 3.8571         | 0.0495          | 4.3548           | 0.0369          |
| Flavobacteriia      | 0                        | 0.65137712, 0.004661     | 0                        | 4.3548         | 0.0369          | 0              | 0               | 4.3548           | 0.0369          |
| Actinobacteria      | 0.071514, 0.000868       | 0                        | 0.02987, 0.000465816     | 4.3548         | 0.0369          | 3.8571         | 0.0495          | 4.3548           | 0.0369          |
| Betaproteobacteria  | 0.148987, 0.00181        | 44.5601165, 0.318856     | 0.04381, 0.0006832       | 3.8571         | 0.0495          | 3.8571         | 0.0495          | 3.8571           | 0.0495          |
| Cytophagia          | 0                        | 1.30275424, 0.009322     | 0                        | 4.3548         | 0.0369          | 0              | 0               | 4.3548           | 0.0369          |
| Bacteroidia         | 0.11323, 0.001375        | 0                        | 0                        | 4.3548         | 0.0369          | 4.3548         | 0.0369          | 0                | 0               |
| Alphaproteobacteria | 7.294386, 0.088595       | 8.31986229, 0.0595339    | 2.086948, 0.032545       | 3.8571         | 0.0495          | 3.8571         | 0.0495          | 3.8571           | 0.0495          |
| Mollicutes          | 0                        | 0                        | 0.053767, 0.000838469    | 0              | 0               | 4.3548         | 0.0369          | 4.3548           | 0.0369          |

| Order              |                          |                          |                          |                |         |                |         |                  |         |
|--------------------|--------------------------|--------------------------|--------------------------|----------------|---------|----------------|---------|------------------|---------|
| V3-V4              | Eggs                     | Larvae                   | Adults                   | Eggs vs adults |         | Eggs vs larvae |         | Larvae vs adults |         |
|                    | Median, IQR <sup>a</sup> | Median, IQR <sup>a</sup> | Median, IQR <sup>a</sup> | Chi-square     | p-value | Chi-square     | p-value | Chi-square       | p-value |
| Rhodocyclales      | 0                        | 9.6522246, 0.069068      | 0                        | 4.3548         | 0.0369  | 0              | 0       | 4.3548           | 0.0369  |
| Clostridiales      | 0.369487, 0.004488       | 0                        | 0.105542, 0.001646       | 4.3548         | 0.0369  | 3.8571         | 0.0495  | 4.3548           | 0.0369  |
| Myxococcales       | 0                        | 0.2960805, 0.0021186     | 0                        | 4.3548         | 0.0369  | 0              | 0       | 4.3548           | 0.0369  |
| Sphingobacteriales | 0                        | 4.0266949, 0.0288136     | 0                        | 4.3548         | 0.0369  | 0              | 0       | 4.3548           | 0.0369  |
| Coriobacteriales   | 0.047676, 0.000579       | 0                        | 0.005974, 0.000093       | 4.3548         | 0.0369  | 3.8571         | 0.0495  | 4.3548           | 0.0369  |
| Cytophagales       | 0                        | 1.3027542, 0.009322      | 0                        | 4.3548         | 0.0369  | 0              | 0       | 4.3548           | 0.0369  |
| Flavobacteriales   | 0                        | 0.6513771, 0.00466       | 0                        | 4.3548         | 0.0369  | 0              | 0       | 4.3548           | 0.0369  |
| Caulobacterales    | 0.005959, 0.000073       | 0.7994174, 0.0057204     | 0.001991, 0.000031       | 3.8571         | 0.0495  | 3.8571         | 0.0495  | 3.8571           | 0.0495  |
| Subgroup_17        | 0                        | 0.0888242, 0.0006356     | 0                        | 4.3548         | 0.0369  | 0              | 0       | 4.3548           | 0.0369  |
| Bifidobacteriales  | 0.071514, 0.000868       | 0                        | 0.02987, 0.000466        | 4.3548         | 0.0369  | 3.8571         | 0.0495  | 4.3548           | 0.0369  |
| Spirochaetales     | 0                        | 0.2960805, 0.0021186     | 0                        | 4.3548         | 0.0369  | 0              | 0       | 4.3548           | 0.0369  |
| Hydrogenophilales  | 0                        | 0.7994174, 0.0057204     | 0                        | 4.3548         | 0.0369  | 0              | 0       | 4.3548           | 0.0369  |
| Xanthomonadales    | 0.035757, 0.000435       | 4.7076801, 0.0336864     | 0.007965, 0.000124       | 3.8571         | 0.0495  | 3.8571         | 0.0495  | 3.8571           | 0.0495  |
| Alteromonadales    | 0                        | 0.1776483, 0.0012712     | 0                        | 4.3548         | 0.0369  | 0              | 0       | 4.3548           | 0.0369  |
| Bacillales         | 0.095351, 0.001158       | 20.873676, 0.149365      | 0.039827, 0.000622       | 3.8571         | 0.0495  | 3.8571         | 0.0495  | 3.8571           | 0.0495  |
| Enterobacteriales  | 4.23718, 0.051464        | 1.0954979, 0.007839      | 35.90029, 0.5598         | 3.8571         | 0.0495  | 3.8571         | 0.0495  | 3.8571           | 0.0495  |
| MVP-88             | 0                        | 0.1184322, 0.000847      | 0                        | 4.3548         | 0.0369  | 0              | 0       | 4.3548           | 0.0369  |
| Rhodospirillales   | 0                        | 0.2664725, 0.0019068     | 0                        | 4.3548         | 0.0369  | 0              | 0       | 4.3548           | 0.0369  |
| Sphingomonadales   | 0.005959, 0.000073       | 0.1184322, 0.000847      | 0                        | 3.8571         | 0.0495  | 4.3548         | 0.0369  | 4.3548           | 0.0369  |
| Mycoplasmatales    | 0                        | 0                        | 0.053767, 0.000838       | 0              | 0       | 4.3548         | 0.0369  | 4.3548           | 0.0369  |
| Burkholderiales    | 0.148987, 0.00181        | 33.960434, 0.243009      | 0.04381, 0.000684        | 3.8571         | 0.0495  | 3.8571         | 0.0495  | 3.8571           | 0.0495  |
| Pseudomonadales    | 24.36826, 0.29597        | 6.9875, 0.05             | 2.598729, 0.040526       | 3.8571         | 0.0495  | 3.8571         | 0.0495  | 3.8571           | 0.0495  |
| SC-I-84            | 0                        | 0.0888242, 0.0006356     | 0                        | 4.3548         | 0.0369  | 0              | 0       | 4.3548           | 0.0369  |
| Subgroup_6         | 0                        | 0.3552966, 0.0025424     | 0                        | 4.3548         | 0.0369  | 0              | 0       | 4.3548           | 0.0369  |
| Neisseriales       | 0                        | 0.0592161, 0.0004238     | 0                        | 4.3548         | 0.0369  | 0              | 0       | 4.3548           | 0.0369  |
| Lactobacillales    | 0.143027, 0.001737       | 1.8060911, 0.0129238     | 0.007965, 0.000124       | 3.8571         | 0.0495  | 3.8571         | 0.0495  | 3.8571           | 0.0495  |
| Rhizobiales        | 7.282467, 0.088451       | 7.1355403, 0.0510594     | 2.084957, 0.032514       | 3.8571         | 0.0495  | 3.8571         | 0.0495  | 3.8571           | 0.0495  |
| Bacteroidales      | 0.11323, 0.001375        | 0                        | 0                        | 4.3548         | 0.0369  | 4.3548         | 0.0369  | 0                | 0       |



| Family                 |                          |                          |                          |                |         |                |         |                  |         |
|------------------------|--------------------------|--------------------------|--------------------------|----------------|---------|----------------|---------|------------------|---------|
| V3-V4                  | Eggs                     | Larvae                   | Adults                   | Eggs vs adults |         | Eggs vs larvae |         | Larvae vs adults |         |
|                        | Median, IQR <sup>a</sup> | Median, IQR <sup>a</sup> | Median, IQR <sup>a</sup> | Chi-square     | p-value | Chi-square     | p-value | Chi-square       | p-value |
| Caulobacteraceae       | 0.005959, 0.000073       | 0.7994174, 0.00572       | 0                        | 3.8571         | 0.0495  | 4.3548         | 0.0369  | 4.3548           | 0.0369  |
| Flavobacteriaceae      | 0                        | 0.4441208, 0.003178      | 0                        | 4.3548         | 0.0369  | 0              | 0       | 4.3548           | 0.0369  |
| Leptospiraceae         | 0                        | 0.2960805, 0.002119      | 0                        | 4.3548         | 0.0369  | 0              | 0       | 4.3548           | 0.0369  |
| Cytophagaceae          | 0                        | 1.3027542, 0.00932       | 0                        | 4.3548         | 0.0369  | 0              | 0       | 4.3548           | 0.0369  |
| Neisseriaceae          | 0                        | 0.0592161, 0.0004238     | 0                        | 4.3548         | 0.0369  | 0              | 0       | 4.3548           | 0.0369  |
| Family_XIII            | 0.017878, 0.000217       | 0                        | 0                        | 4.3548         | 0.0369  | 4.3548         | 0.0369  | 0                | 0       |
| Carnobacteriaceae      | 0.131108, 0.001592       | 0.1480403, 0.001059      | 0                        | 3.8571         | 0.0495  | 4.3548         | 0.0369  | 4.3548           | 0.0369  |
| Chitinophagaceae       | 0                        | 1.9837394, 0.014195      | 0                        | 4.3548         | 0.0369  | 0              | 0       | 4.3548           | 0.0369  |
| KD3-93                 | 0                        | 0.1480403, 0.001059      | 0                        | 4.3548         | 0.0369  | 0              | 0       | 4.3548           | 0.0369  |
| Prevotellaceae         | 0.11323, 0.001375        | 0                        | 0                        | 4.3548         | 0.0369  | 4.3548         | 0.0369  | 0                | 0       |
| Enterobacteriaceae     | 4.23718, 0.051464        | 1.0954979, 0.007839      | 35.9, 0.56               | 3.8571         | 0.0495  | 3.8571         | 0.0495  | 3.8571           | 0.0495  |
| Polyangiaceae          | 0                        | 0.0888242, 0.0006356     | 0                        | 4.3548         | 0.0369  | 0              | 0       | 4.3548           | 0.0369  |
| Alcaligenaceae         | 0.089392, 0.001086       | 29.904131, 0.213984      | 0.04, 0                  | 3.8571         | 0.0495  | 4.3548         | 0.0369  | 4.3548           | 0.0369  |
| Rhizobiaceae           | 0                        | 0.2960805, 0.0021186     | 0.01, 0                  | 4.3548         | 0.0369  | 5              | 0.0253  | 4.3548           | 0.0369  |
| Env.OPS_17             | 0                        | 0.2664725, 0.0019068     | 0                        | 4.3548         | 0.0369  | 0              | 0       | 4.3548           | 0.0369  |
| Lactobacillaceae       | 0                        | 1.0658898, 0.0076272     | 0                        | 4.3548         | 0.0369  | 0              | 0       | 4.3548           | 0.0369  |
| AKYH767                | 0                        | 1.0362818, 0.0074152     | 0                        | 4.3548         | 0.0369  | 0              | 0       | 4.3548           | 0.0369  |
| Pseudomonadaceae       | 24.36826, 0.29597        | 6.5433792, 0.04682       | 2.6, 0.05                | 3.8571         | 0.0495  | 3.8571         | 0.0495  | 3.8571           | 0.0495  |
| Mycoplasmataceae       | 0                        | 0                        | 0.05, 0                  | 0              | 0       | 5              | 0.0253  | 5                | 0.0253  |
| LiUU-11-161            | 0                        | 0.0888242, 0.0006356     | 0                        | 4.3548         | 0.0369  | 0              | 0       | 4.3548           | 0.0369  |
| Bifidobacteriaceae     | 0.071514, 0.000868       | 0                        | 0.03, 0                  | 4.3548         | 0.0369  | 4.3548         | 0.0369  | 5                | 0.0253  |
| Staphylococcaceae      | 0                        | 0.3552966, 0.0025424     | 0                        | 4.3548         | 0.0369  | 0              | 0       | 4.3548           | 0.0369  |
| Oxalobacteraceae       | 0                        | 0.1184322, 0.000847      | 0                        | 4.3548         | 0.0369  | 0              | 0       | 4.3548           | 0.0369  |
| Moraxellaceae          | 0                        | 0.4441208, 0.003178      | 0                        | 4.3548         | 0.0369  | 0              | 0       | 4.3548           | 0.0369  |
| Hydrogenophilaceae     | 0                        | 0.7994174, 0.00572       | 0                        | 4.3548         | 0.0369  | 0              | 0       | 4.3548           | 0.0369  |
| Rhodocyclaceae         | 0                        | 9.6522246, 0.069068      | 0                        | 4.3548         | 0.0369  | 0              | 0       | 4.3548           | 0.0369  |
| Thermoactinomycetaceae | 0.023838, 0.000289       | 4.5892479, 0.032839      | 0.02, 0                  | 3.8571         | 0.0495  | 4.3548         | 0.0369  | 4.3548           | 0.0369  |
| Bacillaceae            | 0.071514, 0.000868       | 15.929131, 0.113984      | 0.02, 0                  | 3.8571         | 0.0495  | 4.3548         | 0.0369  | 4.3548           | 0.0369  |
| Brucellaceae           | 7.276508, 0.088379       | 4.7076801, 0.033686      | 2.08, 0.03               | 3.8571         | 0.0495  | 3.8571         | 0.0495  | 3.8571           | 0.0495  |
| NS9_marine_group       | 0                        | 0.2072564, 0.001483      | 0                        | 4.3548         | 0.0369  | 0              | 0       | 4.3548           | 0.0369  |
| Leuconostocaceae       | 0.011919,                | 0.592161,                | 0                        | 3.8571         | 0.0495  | 4.3548         | 0.0369  | 4.3548           | 0.0369  |

|                    | 0.0001                | 0.0042                  |               |        |        |        |        |        |        |
|--------------------|-----------------------|-------------------------|---------------|--------|--------|--------|--------|--------|--------|
| PHOS-HE51          | 0                     | 0.0592161,<br>0.0004238 | 0             | 4.3548 | 0.0369 | 0      | 0      | 4.3548 | 0.0369 |
| Saprosiraceae      | 0                     | 0.4441208,<br>0.003178  | 0             | 4.3548 | 0.0369 | 0      | 0      | 4.3548 | 0.0369 |
| Burkholderiaceae   | 0.059595,<br>0.000724 | 0.7105932,<br>0.0050848 | 0             | 3.8571 | 0.0495 | 4.3548 | 0.0369 | 4.3548 | 0.0369 |
| Bradyrhizobiaceae  | 0                     | 0.8290254,<br>0.0059322 | 0             | 4.3548 | 0.0369 | 0      | 0      | 4.3548 | 0.0369 |
| Comamonadaceae     | 0                     | 3.2272775,<br>0.02309   | 0             | 4.3548 | 0.0369 | 5      | 0.0253 | 4.3548 | 0.0369 |
| Alteromonadaceae   | 0                     | 0.1776483,<br>0.0012712 | 0             | 4.3548 | 0.0369 | 0      | 0      | 4.3548 | 0.0369 |
| Xanthomonadaceae   | 0.035757,<br>0.000435 | 4.4412076,<br>0.0317796 | 0.01,<br>0    | 3.8571 | 0.0495 | 4.3548 | 0.0369 | 4.3548 | 0.0369 |
| Ruminococcaceae    | 0.351608,<br>0.004271 | 0                       | 0.11,<br>0.01 | 4.3548 | 0.0369 | 3.9706 | 0.0463 | 4.5    | 0.0339 |
| Phyllobacteriaceae | 0.005959,<br>0.000073 | 1.3027542,<br>0.009322  | 0             | 3.8571 | 0.0495 | 4.3548 | 0.0369 | 4.3548 | 0.0369 |
| Sphingomonadaceae  | 0.005959,<br>0.000073 | 0.1184322,<br>0.000847  | 0             | 3.8571 | 0.0495 | 4.3548 | 0.0369 | 4.3548 | 0.0369 |
| Rhodospirillaceae  | 0                     | 0.2664725,<br>0.0019068 | 0             | 4.3548 | 0.0369 | 0      | 0      | 4.3548 | 0.0369 |
| Coriobacteriaceae  | 0.047676,<br>0.000579 | 0                       | 0.01,<br>0    | 4.3548 | 0.0369 | 4.3548 | 0.0369 | 5      | 0.0253 |

| <b>Genus</b>          |                          |                          |                          |                |         |                |         |                  |         |
|-----------------------|--------------------------|--------------------------|--------------------------|----------------|---------|----------------|---------|------------------|---------|
| V3-V4 region          | Eggs                     | Larvae                   | Adults                   | Eggs vs adults |         | Eggs vs larvae |         | Larvae vs adults |         |
|                       | Median, IQR <sup>a</sup> | Median, IQR <sup>a</sup> | Median, IQR <sup>a</sup> | Chi-square     | p-value | Chi-square     | p-value | Chi-square       | p-value |
| <i>Brevundimonas</i>  | 0.005959, 0.000073       | 0.7994174, 0.0057203     | 0.00199, 0.00003         | 3.8571         | 0.0495  | 3.8571         | 0.0495  | 3.8571           | 0.0495  |
| <i>Trichococcus</i>   | 0                        | 0.1480403, 0.0010593     | 0                        | 4.3548         | 0.0369  | 0              | 0       | 4.3548           | 0.0369  |
| <i>Turneriella</i>    | 0                        | 0.2960805, 0.0021186     | 0                        | 4.3548         | 0.0369  | 0              | 0       | 4.3548           | 0.0369  |
| <i>Aeriscardovia</i>  | 0.071514, 0.000868       | 0                        | 0.0299, 0.0005           | 4.3548         | 0.0369  | 3.8571         | 0.0495  | 4.3548           | 0.0369  |
| <i>Acinetobacter</i>  | 0                        | 0.4441208, 0.003178      | 0                        | 4.3548         | 0.0369  | 0              | 0       | 4.3548           | 0.0369  |
| <i>Lentibacillus</i>  | 0.023838, 0.000289       | 9.4449682, 0.0675848     | 0.00797, 0.00013         | 3.8571         | 0.0495  | 3.8571         | 0.0495  | 3.8571           | 0.0495  |
| <i>Ruminococcus</i>   | 0.172825, 0.002099       | 0                        | 0.0378, 0.0006           | 4.3548         | 0.0369  | 3.8571         | 0.0495  | 4.3548           | 0.0369  |
| <i>Ralstonia</i>      | 0.059595, 0.000724       | 0.6513771, 0.004661      | 0                        | 3.8571         | 0.0495  | 4.3548         | 0.0369  | 4.3548           | 0.0369  |
| <i>Sphingopyxis</i>   | 0.005959, 0.000073       | 0.1184322, 0.0008475     | 0                        | 3.8571         | 0.0495  | 4.3548         | 0.0369  | 4.3548           | 0.0369  |
| <i>Dechloromonas</i>  | 0                        | 1.0362818, 0.0074153     | 0                        | 4.3548         | 0.0369  | 0              | 0       | 4.3548           | 0.0369  |
| <i>Kroppenstedtia</i> | 0.023838, 0.000289       | 4.5892479, 0.032839      | 0.0219, 0.0003           | 3.8571         | 0.0495  | 3.8571         | 0.0495  | 3.8571           | 0.0495  |
| <i>Atopobium</i>      | 0.047676, 0.000579       | 0                        | 0.00597, 0.00009         | 4.3548         | 0.0369  | 3.8571         | 0.0495  | 4.3548           | 0.0369  |
| <i>Flavobacterium</i> | 0                        | 0.4441208, 0.003178      | 0                        | 4.3548         | 0.0369  | 0              | 0       | 4.3548           | 0.0369  |
| <i>Leuconostoc</i>    | 0.005959, 0.000073       | 0.2072564, 0.001483      | 0.00398, 0.00006         | 3.8571         | 0.0495  | 3.8571         | 0.0495  | 3.8571           | 0.0495  |
| <i>Sorangium</i>      | 0                        | 0.0888242, 0.0006        | 0                        | 4.3548         | 0.0369  | 0              | 0       | 4.3548           | 0.0369  |
| <i>Atopostipes</i>    | 0.131108, 0.001592       | 0                        | 0                        | 4.3548         | 0.0369  | 4.3548         | 0.0369  | 0                | 0       |
| <i>Piscinibacter</i>  | 0                        | 0.1480403, 0.001059      | 0                        | 4.3548         | 0.0369  | 0              | 0       | 4.3548           | 0.0369  |
|                       |                          |                          |                          |                |         |                |         |                  |         |
| <i>Flavonifractor</i> | 0.005959, 0.000073       | 0                        | 0.00597, 0.00009         | 4.3548         | 0.0369  | 0.4286         | 0.5127  | 4.3548           | 0.0369  |
| <i>Zoogloea</i>       | 0                        | 0.7402013, 0.0052966     | 0                        | 4.3548         | 0.0369  | 0              | 0       | 4.3548           | 0.0369  |
| <i>Weissella</i>      | 0.005959, 0.000073       | 0.3849047, 0.0027542     | 0                        | 3.8571         | 0.0495  | 4.3548         | 0.0369  | 4.3548           | 0.0369  |
| <i>Herbaspirillum</i> | 0                        | 0.1184322, 0.0008475     | 0                        | 4.3548         | 0.0369  | 0              | 0       | 4.3548           | 0.0369  |
| <i>Rhizobium</i>      | 0                        | 0.2960805, 0.0021186     | 0                        | 4.3548         | 0.0369  | 4.3548         | 0.0369  | 3.8571           | 0.0495  |
| <i>Pediococcus</i>    | 0                        | 0.1184322, 0.0008475     | 0                        | 4.3548         | 0.0369  | 0              | 0       | 4.3548           | 0.0369  |
| <i>Luteibacter</i>    | 0.011919, 0.000145       | 0.0592161, 0.0004237     | 0.00398, 0.00006         | 3.8571         | 0.0495  | 3.8571         | 0.0495  | 3.8571           | 0.0495  |
| <i>Achromobacter</i>  | 0.089392, 0.001086       | 29.815307, 0.2133475     | 0.0378, 0.0006           | 3.8571         | 0.0495  | 3.8571         | 0.0495  | 3.8571           | 0.0495  |
| <i>Thermomonas</i>    | 0                        | 0.2960805, 0.0021186     | 0                        | 4.3548         | 0.0369  | 0              | 0       | 4.3548           | 0.0369  |
| <i>Azotobacter</i>    | 2.294394, 0.027867       | 1.3027542, 0.009322      | 0.175, 0.002             | 3.8571         | 0.0495  | 3.8571         | 0.0495  | 3.8571           | 0.0495  |
| <i>Intestinimonas</i> | 0.005959, 0.000073       | 0                        | 0.00199, 0.00003         | 4.3548         | 0.0369  | 3.8571         | 0.0495  | 4.3548           | 0.0369  |
| <i>Thauera</i>        | 0                        | 0.6513771, 0.00466       | 0                        | 4.3548         | 0.0369  | 0              | 0       | 4.3548           | 0.0369  |
| <i>Escherichia-</i>   | 4.23718,                 | 1.0954979,               | 35.9,                    | 3.8571         | 0.0495  | 3.8571         | 0.0495  | 3.8571           | 0.0495  |

|                                  |                       |                         |                     |        |        |        |        |        |        |
|----------------------------------|-----------------------|-------------------------|---------------------|--------|--------|--------|--------|--------|--------|
| <i>Shigella</i>                  | 0.051464              | 0.00784                 | 0.5                 |        |        |        |        |        |        |
| <i>Delftia</i>                   | 0                     | 2.2798199,<br>0.0163    | 0.00597,<br>0.00009 | 4.3548 | 0.0369 | 4.3548 | 0.0369 | 3.8571 | 0.0495 |
| <i>Prevotella</i>                | 0.083433,<br>0.001013 | 0                       | 0                   | 4.3548 | 0.0369 | 4.3548 | 0.0369 | 0      | 0      |
| <i>Mycoplasma</i>                | 0                     | 0                       | 0.0538,<br>0.0008   | 0      | 0      | 4.3548 | 0.0369 | 4.3548 | 0.0369 |
| <i>Azospirillum</i>              | 0                     | 0.2664725,<br>0.0019    | 0                   | 4.3548 | 0.0369 | 0      | 0      | 4.3548 | 0.0369 |
| <i>Lautropia</i>                 | 0                     | 0.0592161,<br>0.0004237 | 0                   | 4.3548 | 0.0369 | 0      | 0      | 4.3548 | 0.0369 |
| <i>Ferruginibacter</i>           | 0                     | 0.4441208,<br>0.003178  | 0                   | 4.3548 | 0.0369 | 0      | 0      | 4.3548 | 0.0369 |
| <i>Dokdonella</i>                | 0.011919,<br>0.000145 | 3.3161017,<br>0.0237288 | 0                   | 3.8571 | 0.0495 | 4.3548 | 0.0369 | 4.3548 | 0.0369 |
| <i>Oceanobacillus</i>            | 0                     | 1.6876589,<br>0.012076  | 0                   | 4.3548 | 0.0369 | 0      | 0      | 4.3548 | 0.0369 |
| <i>BDI-7 clade</i>               | 0                     | 0.1776483,<br>0.00127   | 0                   | 4.3548 | 0.0369 | 0      | 0      | 4.3548 | 0.0369 |
| <i>Pseudaminobacter</i>          | 0.005959,<br>0.000073 | 1.3027542,<br>0.0093    | 0.00199,<br>0.00003 | 3.8571 | 0.0495 | 3.8571 | 0.0495 | 3.8571 | 0.0495 |
| <i>Lactobacillus</i>             | 0                     | 0.9474576,<br>0.0067797 | 0.00398,<br>0.00006 | 4.3548 | 0.0369 | 4.3548 | 0.0369 | 3.8571 | 0.0495 |
| <i>Stenotrophomonas</i>          | 0.011919,<br>0.000145 | 0.6809852,<br>0.00487   | 0.00398,<br>0.00006 | 3.8571 | 0.0495 | 3.8571 | 0.0495 | 3.8571 | 0.0495 |
| <i>Ochrobactrum</i>              | 7.276508,<br>0.088379 | 4.7076801,<br>0.033686  | 2.08,<br>0.03       | 3.8571 | 0.0495 | 3.8571 | 0.0495 | 3.8571 | 0.0495 |
| <i>Candidatus_Accumulibacter</i> | 0                     | 1.2139301,<br>0.008686  | 0                   | 4.3548 | 0.0369 | 0      | 0      | 4.3548 | 0.0369 |
| <i>Bacillus</i>                  | 0.005959,<br>0.000073 | 2.8127648,<br>0.020127  | 0.00398,<br>0.00006 | 3.8571 | 0.0495 | 3.8571 | 0.0495 | 3.8571 | 0.0495 |
| <i>Pseudomonas</i>               | 22.07386,<br>0.268    | 5.240625,<br>0.0375     | 2.42,<br>0.04       | 3.8571 | 0.0495 | 3.8571 | 0.0495 | 3.8571 | 0.0495 |
| <i>Staphylococcus</i>            | 0                     | 0.3552966,<br>0.0025424 | 0                   | 4.3548 | 0.0369 | 0      | 0      | 4.3548 | 0.0369 |

<sup>a</sup>Data represent median and interquartile range (IQR) values from pooled populations (i.e from each sheep) of eggs/larvae/adults (male and female) come from three different sheep (natural infection).

Supplementary Table S7: An average composition of significantly different microbial taxa associated with *H. contortus* eggs, larvae and adults using 16S rRNA gene (V5-V7 region). *P*-values were calculated using Kruskal-Wallis test. The level of significance was determined at  $P < 0.05$ .

| <b>Phylum</b>    |                          |                          |                          |                |                 |                |                 |                  |                 |
|------------------|--------------------------|--------------------------|--------------------------|----------------|-----------------|----------------|-----------------|------------------|-----------------|
| V5-V7 region     | Eggs                     | Larvae                   | Adults                   | Eggs vs adults |                 | Eggs vs larvae |                 | Larvae vs adults |                 |
|                  | Median, IQR <sup>a</sup> | Median, IQR <sup>a</sup> | Median, IQR <sup>a</sup> | Chi-square     | <i>p</i> -value | Chi-square     | <i>p</i> -value | Chi-square       | <i>p</i> -value |
| Bacteroidetes    | 0.003944, 0.000023       | 0.72159937, 0.0091729    | 0.003616, 0.00005        | 3.8571         | 0.0495          | 3.8571         | 0.0495          | 3.8571           | 0.0495          |
| Proteobacteria   | 33.8843, 0.19932         | 45.448425, 0.5777345     | 35.9174, 0.49747         | 3.8571         | 0.0495          | 3.8571         | 0.0495          | 3.8571           | 0.0495          |
| Gemmatimonadetes | 0.006574, 0.000038       | 0.21586306, 0.002744     | 0.005424, 0.000075       | 3.8571         | 0.0495          | 3.8571         | 0.0495          | 3.8571           | 0.0495          |
| Actinobacteria   | 0.010518, 0.00006        | 0.203528, 0.002587       | 0.012655, 0.000175       | 3.8571         | 0.0495          | 3.8571         | 0.0495          | 3.8571           | 0.0495          |
| Firmicutes       | 0.084145, 0.000495       | 0.0801777, 0.0010192     | 0.047005, 0.000651       | 3.8571         | 0.0495          | 3.8571         | 0.0495          | 3.8571           | 0.0495          |

| <b>Class</b>        |                          |                          |                          |                |                 |                |                 |                  |                 |
|---------------------|--------------------------|--------------------------|--------------------------|----------------|-----------------|----------------|-----------------|------------------|-----------------|
| V5-V7               | Eggs                     | Larvae                   | Adults                   | Eggs vs adults |                 | Eggs vs larvae |                 | Larvae vs adults |                 |
|                     | Median, IQR <sup>a</sup> | Median, IQR <sup>a</sup> | Median, IQR <sup>a</sup> | Chi-square     | <i>p</i> -value | Chi-square     | <i>p</i> -value | Chi-square       | <i>p</i> -value |
| Actinobacteria      | 0.009203, 0.000054       | 0.203528, 0.002587       | 0.003616, 0.00005        | 3.9706         | 0.0463          | 3.8571         | 0.0495          | 3.9706           | 0.0463          |
| Gammaproteobacteria | 32.58268, 0.19167        | 7.333177, 0.093219       | 34.90498, 0.48345        | 3.9706         | 0.0463          | 3.8571         | 0.0495          | 3.9706           | 0.0463          |
| Betaproteobacteria  | 0.649497, 0.00382        | 32.83586, 0.4174         | 0.305534, 0.004232       | 3.9706         | 0.0463          | 3.8571         | 0.0495          | 3.9706           | 0.0463          |
| Coriobacteriia      | 0.001315, 0.000008       | 0                        | 0.009039, 0.000126       | 4.3548         | 0.0369          | 3.8571         | 0.0495          | 4.3548           | 0.0369          |
| Clostridia          | 0.009203, 0.000054       | 0                        | 0.030734, 0.000425       | 4.3548         | 0.0369          | 3.8571         | 0.0495          | 4.3548           | 0.0369          |
| Bacilli             | 0.074942, 0.00044        | 0.080178, 0.00102        | 0.016271, 0.000225       | 3.9706         | 0.0463          | 3.8571         | 0.0495          | 3.9706           | 0.0463          |
| Gemmatimonadetes    | 0.006574, 0.000038       | 0.215863, 0.002744       | 0.005424, 0.000075       | 3.9706         | 0.0463          | 3.8571         | 0.0495          | 3.9706           | 0.0463          |
| Alphaproteobacteria | 0.652127, 0.003836       | 5.279394, 0.06711        | 0.706886, 0.00979        | 3.9706         | 0.0463          | 3.8571         | 0.0495          | 3.9706           | 0.0463          |
| Sphingobacteriia    | 0.003944, 0.000023       | 0.721599, 0.009173       | 0.003616, 0.00005        | 3.9706         | 0.0463          | 3.8571         | 0.0495          | 3.9706           | 0.0463          |

| <b>Order</b>       |                          |                          |                          |                |         |                |         |                  |         |
|--------------------|--------------------------|--------------------------|--------------------------|----------------|---------|----------------|---------|------------------|---------|
| V5-V7 region       | Eggs                     | Larvae                   | Adults                   | Eggs vs adults |         | Eggs vs larvae |         | Larvae vs adults |         |
|                    | Median, IQR <sup>a</sup> | Median, IQR <sup>a</sup> | Median, IQR <sup>a</sup> | Chi-square     | p-value | Chi-square     | p-value | Chi-square       | p-value |
| Rhodospirillales   | 0.003944, 0.000023       | 0.117183, 0.00149        | 0                        | 3.9706         | 0.0463  | 4.3548         | 0.0369  | 4.5              | 0.0339  |
| Enterobacteriales  | 0.678422, 0.00399        | 0.567411, 0.007212       | 31.52242, 0.4366         | 3.9706         | 0.0463  | 3.8571         | 0.0495  | 3.9706           | 0.0463  |
| Coriobacteriales   | 0.001315, 0.000008       | 0                        | 0.009039, 0.000126       | 4.3548         | 0.0369  | 3.8571         | 0.0495  | 4.3548           | 0.0369  |
| Xanthomonadales    | 0.040758, 0.00024        | 1.332183, 0.016934       | 0.001808, 0.000025       | 3.9706         | 0.0463  | 3.8571         | 0.0495  | 3.9706           | 0.0463  |
| Micrococcales      | 0.009203, 0.000054       | 0.17269, 0.002195        | 0.001808, 0.000025       | 3.9706         | 0.0463  | 3.8571         | 0.0495  | 3.9706           | 0.0463  |
| Sphingobacteriales | 0.003944, 0.000023       | 0.721599, 0.00917        | 0.003616, 0.00005        | 3.9706         | 0.0463  | 3.8571         | 0.0495  | 3.9706           | 0.0463  |
| Sphingomonadales   | 0.005259, 0.00003        | 0.166523, 0.002117       | 0                        | 3.9706         | 0.0463  | 4.3548         | 0.0369  | 4.5              | 0.0339  |
| Caulobacteriales   | 0.007889, 0.000047       | 0.604417, 0.007684       | 0.010847, 0.00015        | 3.9706         | 0.0463  | 3.8571         | 0.0495  | 3.9706           | 0.0463  |
| Clostridiales      | 0.009203, 0.000054       | 0                        | 0.030734, 0.000425       | 4.3548         | 0.0369  | 3.8571         | 0.0495  | 4.3548           | 0.0369  |
| Bacillales         | 0.074942, 0.00044        | 0.080178, 0.00102        | 0.016271, 0.000225       | 3.9706         | 0.0463  | 3.8571         | 0.0495  | 3.9706           | 0.0463  |
| Corynebacteriales  | 0                        | 0.030838, 0.000392       | 0.001808, 0.000025       | 4.5            | 0.0339  | 4.3548         | 0.0369  | 3.9706           | 0.0463  |
| Burkholderiales    | 0.649497, 0.00382        | 32.83586, 0.4174         | 0.305534, 0.004232       | 3.9706         | 0.0463  | 3.8571         | 0.0495  | 3.9706           | 0.0463  |
| Rhizobiales        | 0.635035, 0.003736       | 4.391271, 0.05582        | 0.696039, 0.009641       | 3.9706         | 0.0463  | 3.8571         | 0.0495  | 3.9706           | 0.0463  |
| Gemmatimonadales   | 0.006574, 0.000038       | 0.215863, 0.002744       | 0.005424, 0.000075       | 3.9706         | 0.0463  | 3.8571         | 0.0495  | 3.9706           | 0.0463  |
| Pseudomonadales    | 31.8635, 0.18743         | 5.433582, 0.069071       | 3.359065, 0.046524       | 3.9706         | 0.0463  | 3.8571         | 0.0495  | 3.9706           | 0.0463  |

| Family              |                          |                          |                          |                |         |                |         |                  |         |
|---------------------|--------------------------|--------------------------|--------------------------|----------------|---------|----------------|---------|------------------|---------|
| V5-V7 region        | Eggs                     | Larvae                   | Adults                   | Eggs vs adults |         | Eggs vs larvae |         | Larvae vs adults |         |
|                     | Median, IQR <sup>a</sup> | Median, IQR <sup>a</sup> | Median, IQR <sup>a</sup> | Chi-square     | p-value | Chi-square     | p-value | Chi-square       | p-value |
| Mycobacteriaceae    | 0                        | 0.030838, 0.000392       | 0.001810, 0.00002        | 4.5            | 0.0339  | 4.5            | 0.0339  | 4.0909           | 0.0431  |
| Gemmatimonadaceae   | 0.006574, 0.000038       | 0.215863, 0.002744       | 0.005420, 0.00008        | 3.9706         | 0.0463  | 3.8571         | 0.0495  | 3.9706           | 0.0463  |
| Bradyrhizobiaceae   | 0.002630, 0.000015       | 0.468731, 0.005958       | 0.001810, 0.00002        | 3.9706         | 0.0463  | 3.9706         | 0.0463  | 4.0909           | 0.0431  |
| Pseudomonadaceae    | 31.863496, 0.187432      | 5.433582, 0.069071       | 3.360000, 0.05           | 3.9706         | 0.0463  | 3.8571         | 0.0495  | 3.9706           | 0.0463  |
| Enterobacteriaceae  | 0.678422, 0.00399        | 0.567412, 0.007213       | 31.5, 0.4                | 3.9706         | 0.0463  | 3.8571         | 0.0495  | 3.9706           | 0.0463  |
| Coriobacteriaceae   | 0.001315, 0.000008       | 0                        | 0.00904, 0.00012         | 4.3548         | 0.0369  | 3.8571         | 0.0495  | 4.3548           | 0.0369  |
| Caulobacteraceae    | 0.007889, 0.000047       | 0.604417, 0.007684       | 0.0108, 0.0002           | 3.9706         | 0.0463  | 3.8571         | 0.0495  | 3.9706           | 0.0463  |
| Hyphomicrobiaceae   | 0.00263, 0.000015        | 0.203528, 0.002587       | 0                        | 3.9706         | 0.0463  | 4.3548         | 0.0369  | 4.5              | 0.0339  |
| Chitinophagaceae    | 0.00263, 0.000015        | 0.672259, 0.008545       | 0.00362, 0.00005         | 3.9706         | 0.0463  | 3.8571         | 0.0495  | 3.9706           | 0.0463  |
| Rhodospirillaceae   | 0.003944, 0.000023       | 0.117183, 0.00149        | 0                        | 3.9706         | 0.0463  | 4.3548         | 0.0369  | 4.5              | 0.0339  |
| Staphylococcaceae   | 0.003944, 0.000023       | 0.018503, 0.000236       | 0.00542, 0.00008         | 3.9706         | 0.0463  | 3.8571         | 0.0495  | 3.9706           | 0.0463  |
| Comamonadaceae      | 0.011833, 0.00007        | 0.339213, 0.004312       | 0.00181, 0.00002         | 3.9706         | 0.0463  | 3.9706         | 0.0463  | 4.0909           | 0.0431  |
| Burkholderiaceae    | 0.011833, 0.00007        | 0.450229, 0.005724       | 0.00542, 0.00008         | 3.9706         | 0.0463  | 3.8571         | 0.0495  | 3.9706           | 0.0463  |
| Sphingomonadaceae   | 0.005259, 0.00003        | 0.166523, 0.002117       | 0                        | 3.9706         | 0.0463  | 4.3548         | 0.0369  | 4.5              | 0.0339  |
| Microbacteriaceae   | 0.009203, 0.000055       | 0.172690, 0.002195       | 0.00181, 0.00002         | 3.9706         | 0.0463  | 3.9706         | 0.0463  | 4.0909           | 0.0431  |
| Xanthomonadaceae    | 0.040758, 0.00024        | 1.332184, 0.016935       | 0.0235, 0.0004           | 3.9706         | 0.0463  | 3.8571         | 0.0495  | 3.9706           | 0.0463  |
| Ruminococcaceae     | 0.009203, 0.000055       | 0                        | 0.0307, 0.0004           | 4.3548         | 0.0369  | 3.8571         | 0.0495  | 4.3548           | 0.0369  |
| Phyllobacteriaceae  | 0.015777, 0.000093       | 1.005305, 0.012779       | 0.0145, 0.0002           | 3.9706         | 0.0463  | 3.9706         | 0.0463  | 4.0909           | 0.0431  |
| Rhizobiaceae        | 0.005259, 0.00003        | 0.02467, 0.000313        | 0.00362, 0.00005         | 3.9706         | 0.0463  | 3.8571         | 0.0495  | 3.9706           | 0.0463  |
| Sphingobacteriaceae | 0.001315, 0.000008       | 0.04934, 0.000627        | 0                        | 3.9706         | 0.0463  | 4.3548         | 0.0369  | 4.5              | 0.0339  |
| Brucellaceae        | 0.60348, 0.00355         | 2.430001, 0.0309         | 0.674, 0.009             | 3.9706         | 0.0463  | 3.8571         | 0.0495  | 3.9706           | 0.0463  |
| Alcaligenaceae      | 0.625831, 0.003681       | 32.046413, 0.407369      | 0.298, 0.004             | 3.9706         | 0.0463  | 3.8571         | 0.0495  | 3.9706           | 0.0463  |
| Paenibacillaceae    | 0.070998, 0.000418       | 0.061675, 0.000784       | 0.0108, 0.0002           | 3.9706         | 0.0463  | 3.8571         | 0.0495  | 3.9706           | 0.0463  |
| Rhodobiaceae        | 0.001315, 0.000008       | 0.203528, 0.002587       | 0                        | 3.9706         | 0.0463  | 4.3548         | 0.0369  | 4.5              | 0.0339  |

| <b>Genus</b>                  |                          |                          |                          |                |         |                |         |                  |         |
|-------------------------------|--------------------------|--------------------------|--------------------------|----------------|---------|----------------|---------|------------------|---------|
| V5-V7                         | Eggs                     | Larvae                   | Adults                   | Eggs vs adults |         | Eggs vs larvae |         | Larvae vs adults |         |
|                               | Median, IQR <sup>a</sup> | Median, IQR <sup>a</sup> | Median, IQR <sup>a</sup> | Chi-square     | p-value | Chi-square     | p-value | Chi-square       | p-value |
| <b>Sphingobacterium</b>       | 0.00131, 0.000009        | 0.0493400, 0.000627      | 0                        | 4.0909         | 0.0431  | 1              | 0.3173  | 4.5              | 0.0339  |
| <b>Ruminococcus</b>           | 0.00394, 0.000026        | 0                        | 0.0090390, 0.000126      | 1              | 0.3173  | 3.9706         | 0.0463  | 4.3548           | 0.0369  |
| <b>Pseudomonas</b>            | 31.9, 0.157212           | 5.433582, 0.069071       | 3.3590650, 0.046524      | 3.9706         | 0.0463  | 3.8571         | 0.0495  | 3.9706           | 0.0463  |
| <b>Ralstonia</b>              | 0.0118, 0.000068         | 0.450229, 0.005724       | 0.005424, 0.000075       | 4.0909         | 0.0431  | 3.9706         | 0.0463  | 3.9706           | 0.0463  |
| <b>Atopobium</b>              | 0.00131, 0.000009        | 0                        | 0.009039, 0.0001256      | 1              | 0.3173  | 3.9706         | 0.0463  | 4.3548           | 0.0369  |
| <b>Azospirillum</b>           | 0.00394, 0.000026        | 0.117183, 0.00149        | 0                        | 4.0909         | 0.0431  | 1              | 0.3173  | 4.5              | 0.0339  |
| <b>Gemmatimonas</b>           | 0.00657, 0.000043        | 0.215863, 0.00274        | 0.005424, 0.000075       | 4.0909         | 0.0431  | 3.9706         | 0.0463  | 3.9706           | 0.0463  |
| <b>Sphingopyxis</b>           | 0.00526, 0.000035        | 0.154188, 0.00196        | 0                        | 4.0909         | 0.0431  | 4.5            | 0.0339  | 4.5              | 0.0339  |
| <b>Parvibaculum</b>           | 0.00131, 0.000009        | 0.203528, 0.002587       | 0                        | 4.0909         | 0.0431  | 1              | 0.3173  | 4.5              | 0.0339  |
| <b>GKS98_freshwater_group</b> | 0.626, 0.003672          | 32.046413, 0.407369      | 0.298302, 0.004132       | 3.9706         | 0.0463  | 3.8571         | 0.0495  | 3.9706           | 0.0463  |
| <b>Paenibacillus</b>          | 0.071, 0.000406          | 0.061675, 0.000784       | 0.010847, 0.00015        | 4.0909         | 0.0431  | 3.9706         | 0.0463  | 3.9706           | 0.0463  |
| <b>Devosia</b>                | 0.00263, 0.000017        | 0.178858, 0.002274       | 0                        | 4.0909         | 0.0431  | 1              | 0.3173  | 4.5              | 0.0339  |
| <b>Staphylococcus</b>         | 0.00394, 0.000026        | 0.018503, 0.000236       | 0.005424, 0.000075       | 4.0909         | 0.0431  | 3.9706         | 0.0463  | 3.9706           | 0.0463  |
| <b>Microbacterium</b>         | 0.0092, 0.00005          | 0.160355, 0.002038       | 0.001808, 0.000025       | 4.0909         | 0.0431  | 3.9706         | 0.0463  | 3.9706           | 0.0463  |
| <b>Bosea</b>                  | 0.00131, 0.000009        | 0.037005, 0.00047        | 0                        | 4.0909         | 0.0431  | 1              | 0.3173  | 4.5              | 0.0339  |
| <b>Brevundimonas</b>          | 0.00789, 0.000042        | 0.604417, 0.007684       | 0.010847, 0.00015        | 4.0909         | 0.0431  | 3.9706         | 0.0463  | 3.9706           | 0.0463  |
| <b>Aquamicrobium</b>          | 0                        | 0.086345, 0.001097       | 0.001808, 0.000025       | 4.5            | 0.0339  | 4.3548         | 0.0369  | 3.9706           | 0.0463  |
| <b>Rhizobium</b>              | 0.00526, 0.000035        | 0.02467, 0.000314        | 0.003616, 0.00005        | 4.0909         | 0.0431  | 3.9706         | 0.0463  | 3.9706           | 0.0463  |
| <b>Afipia</b>                 | 0                        | 0.12335, 0.001568        | 0                        | 4.5            | 0.0339  | 0              | 0       | 4.5              | 0.0339  |
| <b>Mycobacterium</b>          | 0                        | 0.030838, 0.000392       | 0.001808, 0.000025       | 4.5            | 0.0339  | 4.3548         | 0.0369  | 3.9706           | 0.0463  |
| <b>Escherichia-Shigella</b>   | 0.678, .004418           | 0.567411, 0.007212       | 31.522416, 0.436599      | 4.0909         | 0.0431  | 3.9706         | 0.0463  | 3.9706           | 0.0463  |
| <b>Lysinimonas</b>            | 0                        | 0.012335, 0.000157       | 0                        | 4.5            | 0.0339  | 0              | 0       | 4.5              | 0.0339  |
| <b>Rhodopseudomonas</b>       | 0.00131, 0.000009        | 0.308376, 0.00392        | 0.001808, 0.000025       | 4.0909         | 0.0431  | 3.9706         | 0.0463  | 3.9706           | 0.0463  |
| <b>Dokdonella</b>             | 0.0197, 0.00008          | 0.647589, 0.008232       | 0.005424, 0.000075       | 4.0909         | 0.0431  | 3.9706         | 0.0463  | 3.9706           | 0.0463  |
| <b>Sphingomonas</b>           | 0                        | 0.012335, 0.000157       | 0                        | 4.5            | 0.0339  | 0              | 0       | 4.5              | 0.0339  |
| <b>Hyphomicrobium</b>         | 0                        | 0.02467, 0.000314        | 0                        | 4.5            | 0.0339  | 0              | 0       | 4.5              | 0.0339  |
| <b>Pseudaminobacter</b>       | 0.0158, 0.000124         | 0.91896, 0.011682        | 0.012655, 0.000175       | 4.0909         | 0.0431  | 3.9706         | 0.0463  | 3.9706           | 0.0463  |

<sup>a</sup>Data represent median and interquartile range (IQR) values from pooled populations (i.e. from each sheep) of eggs/larvae/adults (male and female) come from three different sheep (natural infection).



Supplementary Table S8: Microbial community composition associated with the different life-cycle stages of *H. contortus* (V3-V4 region)

| Genus                       | <i>H. contortus</i> eggs <sup>a</sup> | <i>H. contortus</i> larvae <sup>a</sup> | <i>H. contortus</i> adults <sup>a</sup> |
|-----------------------------|---------------------------------------|-----------------------------------------|-----------------------------------------|
| <i>Brevundimonas</i>        | 0.0000368552±0.005951424              | 0.8008475±0.003116797                   | 1.990000e-003±0.0000156179              |
| <i>Trichococcus</i>         | 0                                     | 0.1483051±0.000577185                   | 0                                       |
| <i>Turneriella</i>          | 0                                     | 0.2966102±0.001154369                   | 0                                       |
| <i>Aeriscardovia</i>        | 0.000442262±0.07141708                | 0                                       | 0.0298±0.000234269                      |
| <i>Acinetobacter</i>        | 0                                     | 0.4449153±0.001731554                   | 0                                       |
| <i>Lentibacillus</i>        | 0.000147421±0.02380569                | 9.461864±0.03682439                     | 0.00796±0.0000624716                    |
| <i>Ruminococcus</i>         | 0.001068801±0.1725913                 | 0                                       | 0.0378±0.00029674                       |
| <i>Ralstonia</i>            | 0.000368552±0.05951424                | 0.6525424±0.002539613                   | 0                                       |
| <i>Sphingopyxis</i>         | 0.0000368552±0.005951424              | 0.1186441±0.000461748                   | 0                                       |
| <i>Dechloromonas</i>        | 0                                     | 1.038136±0.004040293                    | 0                                       |
| <i>Kroppenstedtia</i>       | 0.000147421±0.02380569                | 4.597457±0.01789273                     | 0.0219±0.000171797                      |
| <i>Atopobium</i>            | 0.000294842±0.04761139                | 0                                       | 0.00597±0.0000468537                    |
| <i>Flavobacterium</i>       | 0                                     | 0.4449153±0.001731554                   | 0                                       |
| <i>Leuconostoc</i>          | 0.0000368552±0.005951424              | 0.2076271±0.000808059                   | 3.980000e-003±0.0000312358              |
| <i>Sorangium</i>            | 0                                     | 0.08898305±0.000346311                  | 0                                       |
| <i>Atopostipes</i>          | 0.000810814±0.1309313                 | 0                                       | 0                                       |
| <i>Piscinibacter</i>        | 0                                     | 0.1483051±0.000577185                   | 0                                       |
| <i>Flavonifractor</i>       | 0.0000368552±0.005951424              | 0                                       | 0.00597±0.0000468537                    |
| <i>Zoogloea</i>             | 0                                     | 0.7415254±0.002885924                   | 0                                       |
| <i>Weissella</i>            | 0.0000368552±0.005951424              | 0.3855932±0.00150068                    | 0                                       |
| <i>Herbaspirillum</i>       | 0                                     | 0.1186441±0.000461748                   | 0                                       |
| <i>Rhizobium</i>            | 0                                     | 0.2966102±0.001154369                   | 0.00597±0.0000468537                    |
| <i>Pediococcus</i>          | 0                                     | 0.1186441±0.000461748                   | 0                                       |
| <i>Luteibacter</i>          | 0.0000737104±0.01190285               | 0.05932203±0.000230874                  | 3.980000e-003±0.0000312358              |
| <i>Achromobacter</i>        | 0.000552828±0.08927135                | 29.868640±0.116245                      | 0.0378±0.00029674                       |
| <i>Thermomonas</i>          | 0                                     | 0.2966102±0.001154369                   | 0                                       |
| <i>Azotobacter</i>          | 0.01418925±2.291298                   | 1.305085±0.005079225                    | 0.175±0.001374376                       |
| <i>Intestinimonas</i>       | 0.0000368552±0.005951424              | 0                                       | 1.990000e-003±0.0000156179              |
| <i>Thauera</i>              | 0                                     | 0.6525424±0.002539613                   | 0                                       |
| <i>Escherichia-Shigella</i> | 0.02620405±4.231462                   | 1.097458±0.004271167                    | 35.90±0.2815597                         |
| <i>Delftia</i>              |                                       | 2.283898±0.008888645                    | 0.00597±0.0000468537                    |
| <i>Prevotella</i>           | 0.000515973±0.08331993                | 0                                       | 0                                       |
| <i>Mycoplasma</i>           | 0                                     | 0                                       | 0.0537±0.000421684                      |
| <i>Azospirillum</i>         | 0                                     | 0.2669491±0.001038932                   | 0                                       |
| <i>Lautropia</i>            | 0                                     | 0.05932203±0.000230874                  | 0                                       |
| <i>Ferruginibacter</i>      | 0                                     | 0.4449153±0.001731554                   | 0                                       |
| <i>Dokdonella</i>           | 0.0000737104±0.01190285               | 3.322034±0.01292894                     | 0                                       |
| <i>Oceanobacillus</i>       | 0                                     | 1.690678±0.006579906                    | 0                                       |
| <i>BD1-7_clade</i>          | 0                                     | 0.1779661±0.000692622                   | 0                                       |
| <i>Pseudaminobacter</i>     | 0.0000368552±0.005951424              | 1.305085±0.005079225                    | 1.990000e-003±0.0000156179              |
| <i>Lactobacillus</i>        | 0                                     | 0.9491525±0.003693982                   | 3.980000e-003±0.0000312358              |
| <i>Stenotrophomonas</i>     | 0.0000737104±0.01190285               | 0.6822034±0.00265505                    | 3.980000e-003±0.0000312358              |

|                                  |                          |                       |                            |
|----------------------------------|--------------------------|-----------------------|----------------------------|
| <i>Ochrobactrum</i>              | 0.0450002±7.266688       | 4.716102±0.01835447   | 2.07±0.01627386            |
| <i>Candidatus_Accumulibacter</i> | 0                        | 1.216102±0.004732915  | 0                          |
| <i>Bacillus</i>                  | 0.0000368552±0.005951424 | 2.817797±0.01096651   | 3.980000e-003±0.0000312358 |
| <i>Pseudomonas</i>               | 0.1365117±22.044070      | 5.250000±0.02043234   | 2.42±0.019007              |
| <i>Staphylococcus</i>            | 0                        | 0.3559322±0.001385243 | 0                          |

<sup>a</sup>Data represent median and interquartile range (IQR) values from pooled populations (i.e from each sheep) of eggs/larvae/adults (male and female) come from three different sheep ± standard deviation (SD).

Supplementary Table S9: Microbial community composition associated with the different life-cycle stages of *H. contortus* (V5-V7 region) isolated from ovine hosts at the genus

| Genus                         | <i>H. contortus</i> Eggs <sup>a</sup> | <i>H. contortus</i> Larvae <sup>a</sup> | <i>H. contortus</i> Adults <sup>a</sup> |
|-------------------------------|---------------------------------------|-----------------------------------------|-----------------------------------------|
| <i>Sphingobacterium</i>       | 1.310000e-003±3.866980e-006           | 0.04913106±0.000362117                  | 0                                       |
| <i>Ruminococcus</i>           | 3.940000e-003±0.0000116009            | 0                                       | 0.009014423±0.0000662498                |
| <i>Pseudomonas</i>            | <b>31.90±0.09371617</b>               | <b>5.410558±0.03987813</b>              | <b>3.349760±0.02461842</b>              |
| <i>Ralstonia</i>              | 0.0118±0.0000348028                   | 0.4483209±0.003304317                   | 0.005408654±0.0000397499                |
| <i>Atopobium</i>              | 1.310000e-003±0.00000386698           | 0                                       | 0.009014423±0.0000662498                |
| <i>Azospirillum</i>           | 3.940000e-003±0.0000116009            | 0.1166863±0.000860028                   | 0                                       |
| <i>Gemmatimonas</i>           | 0.00657±0.0000193349                  | 0.2149484±0.001584262                   | 0.005408654±0.0000397499                |
| <i>Sphingopyxis</i>           | 0.00526±0.0000154679                  | 0.1535346±0.001131616                   | 0                                       |
| <i>Parvibaculum</i>           | 1.310000e-003±0.00000386698           | 0.2026656±0.001493733                   | 0                                       |
| <i>GKS98_freshwater_group</i> | 0.626±0.001840681                     | 31.910620±0.235195                      | 0.297476±0.002186243                    |
| <i>Paenibacillus</i>          | 0.071±0.000208817                     | 0.06141382±0.000452646                  | 0.01081731±0.0000794997                 |
| <i>Devosia</i>                | 2.630000e-003±0.00000773395           | 0.1781001±0.001312674                   |                                         |
| <i>Staphylococcus</i>         | 3.940000e-003±0.0000116009            | 0.01842415±0.000135794                  | 0.005408654±0.0000397499                |
| <i>Microbacterium</i>         | 0.0092±0.0000270688                   | 0.1596759±0.00117688                    | 0.001802885±0.00001325                  |
| <i>Bosea</i>                  | 1.310000e-003±0.00000386698           | 0.0368483±0.000271588                   | 0                                       |
| <i>Brevundimonas</i>          | 0.00789±0.0000232019                  | 0.6018555±0.004435933                   | 0.01081731±0.0000794997                 |
| <i>Aquamicrobium</i>          | 0                                     | 0.08597936±0.000633705                  | 0.001802885±0.00001325                  |
| <i>Rhizobium</i>              | 0.00526±0.0000154679                  | 0.02456553±0.000181058                  | 0.003605769±0.0000264999                |
| <i>Afipia</i>                 | 0                                     | 0.1228276±0.000905292                   | 0                                       |
| <i>Mycobacterium</i>          | 0                                     | 0.03070691±0.000226323                  | 0.001802885±0.00001325                  |
| <i>Escherichia-Shigella</i>   | <b>0.678±0.00199536</b>               | <b>0.5650072±0.004164345</b>            | <b>31.435100±0.2310262</b>              |
| <i>Lysinimonas</i>            | 0                                     | 0.01228276±0.0000905292                 | 0                                       |
| <i>Rhodopseudomonas</i>       | 1.310000e-003±0.00000386698           | 0.3070691±0.002263231                   | 0.001802885±0.00001325                  |
| <i>Dokdonella</i>             | 0.0197±0.0000580046                   | 0.6448452±0.004752785                   | 0.005408654±0.0000397499                |
| <i>Sphingomonas</i>           | 0                                     | 0.01228276±0.0000905292                 | 0                                       |
| <i>Hyphomicrobium</i>         | 0                                     | 0.02456553±0.000181058                  | 0                                       |
| <i>Pseudaminobacter</i>       | 0.0158±0.0000464037                   | 0.915066±0.006744429                    | 0.01262019±0.0000927497                 |

<sup>a</sup>Data represent average values from pooled populations (i.e from each sheep) of eggs/larvae/adults (male and female) come from three different sheep± standard deviation (SD).

Supplementary Table S10: Microbial community composition associated with the adult stage of *H. contortus* at population (clusters of male and female worms) and individual (single adult female worm) levels (V3-V4 region) isolated from ovine hosts at the genus level.

| Genus                       | <i>H. contortus</i> adults (population level)(Average, $\pm$ SD) <sup>a</sup> | <i>H. contortus</i> adults (Individual female worm level)(Average, $\pm$ SD) <sup>b</sup> |
|-----------------------------|-------------------------------------------------------------------------------|-------------------------------------------------------------------------------------------|
| <i>Brevundimonas</i>        | 1.990000e-003 $\pm$ 0.0000156179                                              | 0.00163131 $\pm$ 0.00015272                                                               |
| <i>Trichococcus</i>         | 0                                                                             | 0                                                                                         |
| <i>Turneriella</i>          | 0                                                                             | 0                                                                                         |
| <i>Aeriscardovia</i>        | 0.0298 $\pm$ 0.000234269                                                      | 0.02447166 $\pm$ 0.00228877                                                               |
| <i>Lentibacillus</i>        | 0.00796 $\pm$ 0.0000624716                                                    | 0.004894266 $\pm$ 0.000458                                                                |
| <i>Ruminococcus</i>         | 0.0378 $\pm$ 0.00029674                                                       | 0.19414332 $\pm$ 0.01815669                                                               |
| <i>Ralstonia</i>            | 0                                                                             | 0                                                                                         |
| <i>Sphingopyxis</i>         | 0                                                                             | 0                                                                                         |
| <i>Dechloromonas</i>        | 0                                                                             | 0                                                                                         |
| <i>Kroppenstedtia</i>       | 0.0219 $\pm$ 0.000171797                                                      | 0.00815722 $\pm$ 0.00076303                                                               |
| <i>Atopobium</i>            | 0.00597 $\pm$ 0.0000468537                                                    | 0.004894266 $\pm$ 0.0004577                                                               |
| <i>Flavobacterium</i>       | 0                                                                             | 0                                                                                         |
| <i>Sorangium</i>            | 0                                                                             | 0                                                                                         |
| <i>Atopostipes</i>          | 0                                                                             | 0                                                                                         |
| <i>Piscinibacter</i>        | 0                                                                             | 0                                                                                         |
| <i>Flavonifractor</i>       | 0.00597 $\pm$ 0.0000468537                                                    | 0.004894266 $\pm$ 0.0004577                                                               |
| <i>Zoogloea</i>             | 0                                                                             | 0                                                                                         |
| <i>Weissella</i>            | 0                                                                             | 0                                                                                         |
| <i>Herbaspirillum</i>       | 0                                                                             | 0                                                                                         |
| <i>Rhizobium</i>            | 0.00597 $\pm$ 0.0000468537                                                    | 0.00163131 $\pm$ 0.00015272                                                               |
| <i>Pediococcus</i>          | 0                                                                             | 0                                                                                         |
| <i>Luteibacter</i>          | 3.980000e-003 $\pm$ 0.0000312358                                              | 0.003262955 $\pm$ 0.000305                                                                |
| <i>Achromobacter</i>        | 0.0378 $\pm$ 0.00029674                                                       | 0.02773495 $\pm$ .002593656                                                               |
| <i>Thermomonas</i>          | 0                                                                             | 0                                                                                         |
| <i>Intestinimonas</i>       | 1.990000e-003 $\pm$ 0.0000156179                                              | 0.00163131 $\pm$ 0.00015272                                                               |
| <i>Thauera</i>              | 0                                                                             | 0                                                                                         |
| <i>Escherichia-Shigella</i> | 35.90 $\pm$ 0.2815597                                                         | 29.4119116 $\pm$ 2.75065773                                                               |
| <i>Delftia</i>              | 0.00597 $\pm$ 0.0000468537                                                    | 0.003262955 $\pm$ 0.000305                                                                |
| <i>Prevotella</i>           | 0                                                                             |                                                                                           |
| <i>Mycoplasma</i>           | 0.0537 $\pm$ 0.000421684                                                      | 0.044049058 $\pm$ 0.0041198                                                               |
| <i>Azospirillum</i>         | 0                                                                             | 0                                                                                         |
| <i>Lautropia</i>            | 0                                                                             | 0                                                                                         |
| <i>Ferruginibacter</i>      | 0                                                                             | 0                                                                                         |
| <i>Dokdonella</i>           | 0                                                                             | 0                                                                                         |
| <i>Oceanobacillus</i>       | 0                                                                             | 0                                                                                         |
| <i>BD1-7_clade</i>          | 0                                                                             | 0                                                                                         |
| <i>Pseudaminobacter</i>     | 1.990000e-003 $\pm$ 0.0000156179                                              | 0.00163131 $\pm$ 0.00015272                                                               |
| <i>Lactobacillus</i>        | 3.980000e-003 $\pm$ 0.0000312358                                              | 0.00163131 $\pm$ 0.00015272                                                               |

|                                  |                            |                         |
|----------------------------------|----------------------------|-------------------------|
| <i>Stenotrophomonas</i>          | 3.980000e-003±0.0000312358 | 0.004894266 ± 0.0004577 |
| <i>Ochrobactrum</i>              | 2.07±0.01627386            | 1.699978513 ± 0.1589851 |
| <i>Candidatus_Accumulibacter</i> | 0                          | 0                       |
| <i>Bacillus</i>                  | 3.980000e-003±0.0000312358 | 0.00163131 ± 0.00015272 |
| <i>Pseudomonas</i>               | 2.42±0.019007              | 1.16812319 ± 0.10924532 |
| <i>Leuconostoc</i>               | 3.980000e-003±0.0000312358 | 0                       |
| <i>Azotobacter</i>               | 0.175±0.001374376          | 0                       |
| <i>Acinetobacter</i>             | 0                          | 0.004894266 ± 0.0004577 |
| <i>Staphylococcus</i>            | 0                          | 0.00652591 ± 0.00061032 |
| <i>Sphingomonas</i>              | 0                          | 0.00163131 ± 0.00015272 |
| <i>Aquamicrobium</i>             | 0                          | 0.00163131 ± 0.00015272 |
| <i>RC9_gut_group</i>             | 0                          | 0.003262955 ± 0.000305  |
| <i>Shinella</i>                  | 0                          | 0.003262955 ± 0.000305  |

<sup>a</sup>Data represent average values from pooled populations (i.e from each sheep) of adults (clusters of male and female) come from three different sheep± standard deviation (SD).

<sup>b</sup>Data represent average values from individual single female worms (i.e from each sheep) come from three different sheep± standard deviation (SD).
